1 **Body size-dependent energy storage causes Kleiber's law scaling of the**  
2 **metabolic rate in planarians**

3

4 **Authors**

5 Albert Thommen<sup>1,2†</sup>, Steffen Werner<sup>2,3†</sup>, Olga Frank<sup>1†</sup>, Jenny Philipp<sup>4</sup>, Oskar Knittelfelder<sup>1</sup>,  
6 Yihui Quek<sup>2,5</sup>, Karim Fahmy<sup>4</sup>, Andrej Shevchenko<sup>1</sup>, Benjamin M. Friedrich<sup>2,6</sup>, Frank Jülicher<sup>2\*</sup>,  
7 Jochen C. Rink<sup>1\*</sup>.

8

9 **Affiliations**

10 <sup>1</sup> Max Planck Institute of Molecular Cell Biology and Genetics, Pfotenhauerstraße 108, 01307  
11 Dresden, Germany.

12 <sup>2</sup> Max Planck Institute for the Physics of Complex Systems, Nöthnitzer Straße 38, 01187  
13 Dresden, Germany.

14 <sup>3</sup> FOM Institute AMOLF, Science Park 104, 1098 XG, Amsterdam, The Netherlands.

15 <sup>4</sup> Helmholtz-Zentrum Dresden - Rossendorf, Institute of Resource Ecology, Bautzner  
16 Landstraße 400, 01328 Dresden, Germany.

17 <sup>5</sup> Massachusetts Institute of Technology, Cambridge, MA 02139, USA.

18 <sup>6</sup> Center for Advancing Electronics Dresden, Technische Universität Dresden, 01062 Dresden,  
19 Germany.

20

21 †These authors contributed equally to this work.

22 \* Corresponding authors: [julicher@pks.mpg.de](mailto:julicher@pks.mpg.de), [rink@mpi-cbg.de](mailto:rink@mpi-cbg.de)

23

24

25 **Abstract**

26 Kleiber's law, or the  $3/4$ -power law scaling of the metabolic rate with body mass, is considered  
27 one of the few quantitative laws in biology, yet its physiological basis remains unknown. Here,  
28 we report Kleiber's law scaling in the planarian *Schmidtea mediterranea*. Its reversible and life  
29 history-independent changes in adult body size over 2 orders of magnitude reveal that Kleiber's  
30 law does not emerge from the size-dependent decrease in cellular metabolic rate, but from a size-  
31 dependent increase in mass per cell. Through a combination of experiment and theoretical  
32 analysis of the organismal energy balance, we further show that the mass allometry is caused by  
33 body size dependent energy storage. Our results reveal the physiological origins of Kleiber's law  
34 in planarians and thus have general implications for understanding a fundamental scaling law in  
35 biology.

36

37

## 38 Introduction

39 Body size varies strikingly across animal phylogeny. From small crustaceans weighing a few ng  
40 to Blue Whales weighing in excess of 150 000 kg, body mass variations span more than 16  
41 orders of magnitude (Makarieva et al., 2008; Sears & Calambokidis, 2002). In spite of such  
42 tremendous variation in scale and physiology, the organismal metabolic rate ( $P$ ; defined as the  
43 heat produced by the organism per unit time measured in Watts, which is related to the rate of  
44 oxygen consumption (McDonald, 2002)) nevertheless follows a general scaling relationship with  
45 body mass ( $M$ ). As originally described by Kleiber in 1932 (Max Kleiber, 1932),  $P$  can be  
46 expressed by a power-law of the form  $P = aM^b$ , with  $b$  being the scaling exponent and  $a$   
47 proportionality constant. Although reported values of  $b$  vary somewhat between studies or  
48 specific animal species, a value of  $b \approx \frac{3}{4}$  is typically observed (Banavar, Cooke, Rinaldo, &  
49 Maritan, 2014; Blaxter, 1989; Brody, 1945; Calder, 1984; Hemmingsen, 1960; M Kleiber, 1961;  
50 Peters, 1983; Schmidt-Nielsen, 1984; G B West & Brown, 2005; Whitfield, 2006) and this  
51 allometric relation between mass and metabolic rate is consequently referred to as the “three-  
52 quarter” or “Kleiber’s law”. This implies that the specific metabolic rate ( $P/M$ ) decreases as body  
53 mass increases, which is commonly interpreted as reflecting a size-dependent decrease of  
54 cellular metabolic rates. Surprisingly, despite being known since more than 80 years and termed  
55 one of the few quantitative laws in biology (Geoffrey B West, 1999), the physiological basis of  
56 Kleiber’s law remains under intense debate. The fact that all animals, irrespective of physiology,  
57 habitat or life style, obey Kleiber’s law suggests a fundamental constraint in animal metabolism  
58 (G B West & Brown, 2005). Many hypotheses have been proposed that suggest a variety of  
59 origins of Kleiber’s law. A major class of hypotheses are based on internal physical constraints  
60 (Glazier, 2005), for example space-filling fractal transportation networks (Geoffrey B West,

61 Brown, & Enquist, 1997) or size-dependent limitation of resource transport across external and  
62 internal body surfaces (Davison, 1955; McMahon, 1973). Another class of hypotheses concerns  
63 external ecological constraints, for example the optimization of body size for maximising  
64 reproductive fitness (Kozlowski & Weiner, 1997). However, experimental validations have  
65 proven difficult, due to inter-species differences in anatomy or ageing-associated physiological  
66 changes within a species. As a result, all hypotheses regarding the origins of Kleiber's law  
67 remain controversial also because a suitable model system has not been established.

68

69 Flatworm laboratory models offer interesting opportunities in this respect. Although usually  
70 studied for their regenerative abilities and pluripotent adult stem cells (Reddien & Alvarado,  
71 2004; Rink, 2012; Saló & Agata, 2012), the model species *S. mediterranea* and other planarians  
72 display tremendous changes in body size. They grow when fed and literally shrink when starving  
73 (Baguña et al., 1990), which in *S. mediterranea* amounts to reversible body length fluctuations  
74 between ~0.5 mm and ~20 mm. Such >40-fold changes in body length in a laboratory model  
75 facilitate quantifications of  $P$  and  $M$  as pre-condition for applying and testing of theoretical  
76 approaches. Moreover, the commonly studied asexual strain of *S. mediterranea* and other  
77 asexual planarians do not seem to age, thus rendering their reversible size changes independent  
78 of organismal aging (Glazier, 2005). Previous studies of metabolic rate scaling in planarians  
79 suggest a size-dependence of  $O_2$ -consumption (Daly & Matthews, 1982; Hyman, 1919), but the  
80 size dependence of  $P$  has so far not been systematically quantified. We here report that metabolic  
81 rate scaling in *S. mediterranea* indeed follows Kleiber's law and we apply a combination of  
82 experiments and theory to understand its physiological basis. Our analysis of the organismal  
83 energy balance reveals that the size-dependent decrease in the specific metabolic rate does not

84 reflect a decrease in the metabolic rate per cell, but instead an increase in the mass per cell.  
85 Further, we demonstrate that the cell mass allometry reflects a size-dependent increase in lipid  
86 and glycogen stores. Our results therefore demonstrate that size-dependent energy storage causes  
87 Kleiber's law scaling in planarians.

88

89

## 90 **Results**

91

### 92 **Planarians display Kleiber's law scaling of the metabolic rate**

93 Kleiber's law describes the scaling of metabolic rate with the mass of animals. In order to test  
94 whether the tremendous body size fluctuations of *S. mediterranea* (*Figure 1A*) follow Kleiber's  
95 law, we needed to devise methods to accurately quantify the mass and metabolic rate of  
96 planarians.

97

98 To measure mass, we quantified both the dry and wet mass of individual planarians. Though dry  
99 mass measurements avoid the challenging removal of residual water from the mucus-coated  
100 animals, they are lethal and can therefore only be carried out once. As shown in *Figure 1B*, the  
101 wet and dry mass of *S. mediterranea* vary over  $> 2$  orders of magnitude. Moreover, the near-  
102 constant ratio between wet and dry mass ( $\sim 5$ ; implying 80% water content) indicates minimal  
103 variations of the water content and thus facile interconversion of the two mass measurements.

104 In order to quantify metabolic rate, we measured the heat generated by live planarians of  
105 different sizes via microcalorimetry. Microcalorimetry measures the integrated heat generated by  
106 metabolic processes inside the animal and therefore provides a pathway-independent measure of

107 total metabolic activity (Kemp & Guan, 1997). Cohorts of equally-sized 2 week-starved animals  
108 were enclosed in vials and their heat emission measured over a period of > 24 h (*Figure 1 –*  
109 *figure supplement 1*). Since animals were not immobilized, our measurements effectively reflect  
110 the routine metabolic rate that is generally used for aquatic animals (Dall, 1986). As shown in  
111 *Figure 1C*, the metabolic rate measurements increase with mass over nearly 3 orders of  
112 magnitude (from ~ 0.02 to 10  $\mu$ W). The data points can be fit with a single power law that  
113 accurately describes the size-dependence of the metabolic rate across the entire size range.  
114 Intriguingly, the value of the scale exponent is  $0.75 \pm 0.01$  and thus identical with the ~ 0.75  
115 exponent associated with Kleiber's law in inter-species comparisons. Consequently, the slope of  
116 the planarian data points (red) exactly parallels the characteristic slope of extensive published  
117 data sets of specific metabolic rate measurements (Makarieva et al., 2008) (*Figure 1D*). While  
118 the offsets between endo- and ectotherm traces might reflect different temperature regimes as  
119 previously noted (Hemmingsen, 1960; Makarieva et al., 2008), the common slopes stresses the  
120 universal nature of the  $3/4$  law exponent across animal phylogeny. The fact that the same power  
121 law exponent is associated with the entire growth/degrowth-dependent body size interval of a  
122 planarian suggests that the same underlying principles are at work and that *S. mediterranea* is  
123 therefore a suitable model system for probing the physiological basis of Kleiber's law.

124

### 125 **Size-dependence of planarian growth/degrowth dynamics**

126 The physiological causes of planarian body size fluctuations are growth and degrowth.  
127 Therefore, understanding their underlying regulation might provide insights into the size-  
128 dependence of the metabolic rate. Planarian body size measurements are challenging due to their  
129 soft and highly deformable bodies. We therefore adapted our semi-automated live-imaging

130 pipeline that extracts size measurements from multiple movie frames displaying the animals in  
131 an extended body posture (Werner, Rink, Riedel-Kruse, & Friedrich, 2014). We found that plan  
132 area provides the most robust size measure (*Figure 2 – figure supplement 1* and (Werner et al.,  
133 2014)), which we therefore use in the following. One first important question is to what extent  
134 size changes reflect a change in cell number. Since previous cell number estimates produced  
135 conflicting results (Romero & Baguña, 1991; Takeda, Nishimura, & Agata, 2009) we developed  
136 two independent assays. First, we combined cell dissociation (Romero & Baguña, 1991) with  
137 automated counting of fluorescently stained nuclei (*Figure 2A, top* and *Figure 2 – figure*  
138 *supplement 2*). Second, we used quantitative Western blotting to quantify the amount of the core  
139 Histone H3 in whole worm lysates, which we found to increase linearly with the number of cells  
140 (*Figure 2A, bottom*). Applying both assays to individually sized *S. mediterranea* revealed a close  
141 agreement between the two methods and scaling of cell numbers with plan area by a power law  
142 with the exponent 1.19 (*Figure 2B*), consistent with the previous conclusion that planarian body  
143 size changes largely reflect changes in cell numbers (Baguña et al., 1990). Further, knowledge of  
144 the cell number/area scaling law allows the accurate interconversion of plan area into cell  
145 numbers in the experiments below.

146

147 To measure growth and degrowth rates, we quantified the change in plan area of individual *S.*  
148 *mediterranea* subjected to feeding at regular time intervals (*Figure 2C*) or continuous starvation  
149 (*Figure 2D*). Although individual measurements were noisy due to the aforementioned size  
150 quantification challenges, the data on >100 animals cumulatively reveal stereotypic time  
151 trajectories for both growth and degrowth (*Figure 2C-D, insets*). Therefore, planarian growth  
152 and degrowth dynamics are highly coordinated at the organismal level and our data are suitable

153 for extracting the underlying rate constants. As shown in *Figure 2E*, we found that the growth  
154 rate of *S. mediterranea* decreases with body size, consistent with previous data (Baguña et al.,  
155 1990). Unexpectedly, our analysis additionally revealed a similar size dependence of the  
156 degrowth rate. Interestingly, both growth and degrowth rates appeared to be largely independent  
157 of feeding history and thus solely a function of size (*Figure 2 – figure supplement 3A*). Taken  
158 together, our findings demonstrate that not only the specific metabolic rate (*Figure 1C-D*), but  
159 also the growth/degrowth rates decrease with body size in *S. mediterranea*.

160

### 161 **Systems-level control of planarian growth dynamics**

162 Since growth reflects the metabolic assimilation of environmental resources and degrowth their  
163 subsequent catabolism, both are related to the overall metabolic rate of the animal. Therefore, the  
164 size dependence of growth/degrowth (*Figure 2E*) and metabolic rate (*Figure 1C-D*) might reflect  
165 a common physiological origin of the underlying scaling laws. We therefore devised a theoretical  
166 framework of planarian growth/degrowth as a function of the metabolic energy budget (*Figure*  
167 *3A*). The central element of our model and previous approaches (Hou et al., 2008; Kooijman,  
168 2009) is the organismal energy content  $E$ , which represents the sum of all physiologically  
169 accessible energy stores (e.g., carbohydrates, lipids and proteins). The energy content  $E$  fuels all  
170 metabolic processes within the animal, which collectively convert  $E$  into heat as measured by our  
171 microcalorimetry approach (*Figure 1C-D*). Hence, starvation results in a decrease of  $E$ , overall  
172 net catabolism and degrowth. However,  $E$  increases if the influx of energy obtained from the  
173 food ( $J$ ) exceeds the energy lost through heat ( $P$ ), which leads to net assimilation of resources  
174 and thus growth. The fact that planarians grow/degrow largely by a change in total cell numbers  
175 (*Figure 2B*) (Baguña et al., 1990; Romero & Baguña, 1991), fundamentally interconnects the



176 organismal energy balance to organismal cell numbers. While excess energy from food intake  
177 stimulates increased cell proliferation (Baguña, 1974) and growth, a starvation-induced net loss  
178 of energy decreases total cell numbers and thus, body size. Therefore, our framework relates  
179 changes in cell number during growth/degrowth to the energy content of the animal (*Figure 3A*).  
180 Importantly, our model does not make any assumptions regarding the underlying cellular or  
181 metabolic mechanisms, but simply states the physical energy balance of planarians.

182

183 With our quantitative data as experimental constraint (*Figure 2C-E*), the model allows us to  
184 explore hypothetical systems-level control paradigms of growth/degrowth dynamics (see also  
185 *Figure 3 – figure supplement 1*). In the first paradigm (*Figure 3B, left column*), dynamic changes  
186 in the organismal energy content depend on feeding conditions. Changes in cell number (e.g.,  
187 rates of cell division and/or cell death) depend on the energy content per cell (*Figure 3 – figure*  
188 *supplement 2*). Consequently, two planarians with the same cell number might have different  
189 energy levels depending on the respective feeding history. In paradigm 2 (*Figure 3B, centre*  
190 *column*), the energy content is proportional to total cell number, i.e. it scales isometrically. Thus,  
191 growth occurs when “surplus” energy obtained from food is converted into new cells, whereas  
192 degrowth is the consequence of catabolism of existing cells in order to replenish metabolic  
193 energy. In paradigm 3, the energy content is also tightly coupled to cell number, but scales in a  
194 size-dependent manner with a characteristic exponent  $c$ , i.e. it scales allometrically. Theoretical  
195 analysis reveals that all three paradigms can approximate the measured growth/degrowth  
196 dynamics (*Figure 3C*). However, they differ in their specific predictions of the scaling  
197 behaviours of  $E$ ,  $P$  and  $J$  with organismal cell number  $N$  (*Figure 3B*).

198

199 In order to experimentally distinguish between the paradigms, we consequently quantified  $E$ ,  $P$   
200 and  $J$  as a function of cell number ( $N$ ). In order to obtain values for  $P/N$  (metabolic rate/cell), we  
201 converted our measurements of  $P$  as a function of dry mass (*Figure 1 – figure supplement 1B*)  
202 using the scaling laws for  $N$  and dry mass with plan area (*Figure 2B* and *Figure 3 – figure*  
203 *supplement 3A*). As shown in *Figure 3D*, the  $P/N$  estimates are of the order of 1 pW, similar to  
204 the average metabolic rate of a human cell (Bianconi et al., 2013; Purves & Sadava, 2004).  
205 Further,  $P/N$  is essentially independent of organismal cell number and animal size (scale  
206 exponent 0.05 +/- 0.02), which rules out paradigm 2 (*Figure 3B*) as possible control principle.  
207 The size *independence* of  $P/N$  is further intriguing, as it implies that the size *dependence* of  $P/M$   
208 as foundational basis of Kleiber’s law originates from size dependencies of  $M/N$  (mass per cell;  
209 see below).

210

211 To measure the food intake  $J$ , we developed an assay based on the homogenous dispersion of a  
212 known amount of small fluorescent beads in a known volume of planarian sustenance food (liver  
213 paste). Lysis of pre-sized animals immediately after feeding and quantification of bead numbers  
214 in the lysate thus provided a measure of the ingested food volume as a function of size (*Figure 3*  
215 *– figure supplement 3B-D*). Although individual measurements varied significantly (likely  
216 reflecting inter-animal differences under our *ad libitum* feeding conditions),  $J/N$  did not display a  
217 clear size dependence (exponent  $0.00 \pm 0.03$ ) (*Figure 3E*). Therefore, the volume of ingested  
218 food and thus energy uptake remains proportional to organismal cell number across the entire  
219 size range, which argues against both paradigms 1 and 2 (*Figure 3B*).

220

221 To approximate the energy content  $E$  of entire worms, we turned to bomb calorimetry. This  
222 method quantifies the heat release upon complete combustion of dried tissue in pure oxygen,  
223 thus providing a measure of gross energy content (McDonald, 2002). Our assay conditions  
224 allowed reproducible quantification of  $E$  of as little as 3 mg of dried tissue (*Figure 3 – figure*  
225 *supplement 3E*), corresponding to 200 planarians of a length of 2 mm (*Figure 3 – figure*  
226 *supplement 3A* and *Figure 2 – figure supplement 1D*). Intriguingly,  $E/N$  significantly increased  
227 with organismal cell numbers (scaling exponent  $0.38 \pm 0.03$ , *Figure 3F*), as assumed by  
228 paradigm 3 (*Figure 3B*). Moreover, the experimentally measured scaling exponent of the energy  
229 content agrees quantitatively with the prediction of paradigm 3 on basis of the experimentally  
230 measured growth/degrowth rates (*Figure 3F*; black solid line). The experimentally measured  
231 gross energy content and the physiologically accessible energy content  $E$  (green and black solid  
232 lines in *Figure 3F*) differ by a constant factor (2). The fact that the scaling exponent follows the  
233 prediction of paradigm 3 demonstrates the quantitative agreement between model and  
234 experiment and identifies size-dependent energy storage as systems-level control paradigm of  
235 planarian growth/degrowth dynamics.

236

### 237 **Size dependence of physiological energy stores**

238 Since animals store energy in the form of biochemical compounds, size-dependent energy  
239 storage should consequently result in biochemically measurable effects. Little is currently known  
240 about planarian energy metabolism, but animals generally store metabolic energy in the form of  
241 triglycerides (TGs) inside lipid droplets (Birsoy, Festuccia, & Laplante, 2013). We therefore  
242 stained cross-sections of large and small animals with the lipid droplet marker LD540 (Spandl,  
243 White, Peychl, & Thiele, 2009). Both revealed prominent lipid droplets primarily within the

244 intestinal epithelium, thus suggesting that the planarian intestine serves as a fat storage organ, as  
245 in *C. elegans* (Mak, 2012). However, the amount and size of the droplets per cell notably  
246 increased in large animals (*Figure 4A*). To obtain a quantitative measure of the lipid content size-  
247 dependence, we optimized total lipid extraction for planarians (*Figure 4 – figure supplement 1A*)  
248 and used mass spectrometry to measure the absolute amounts of various lipid classes (*Figure 4 –*  
249 *figure supplement 1B*). The 88-fold increase in TGs per unit cell in large planarians as compared  
250 to small animals (*Figure 4B*) demonstrates a striking size dependence of lipid stores in *S.*  
251 *mediterranea*.

252  
253 To further assess a possible size dependence of carbohydrate stores, we applied Best's Carmine  
254 stain to cross-sections of large and small animals in order to probe for glycogen granules (*Figure*  
255 *4C, left*). Comparison between adjacent sections with and without amyloglucosidase pre-  
256 treatment as specificity control (*Figure 4C, right*) together with the expression patterns of  
257 glycogen synthesis genes (*Figure 4 – figure supplement 1C*) both indicate a storage role of the  
258 planarian intestine for glycogen granules, thus again emphasizing the organ's likely central role  
259 in energy homeostasis. Interestingly, also the intensity of glycogen staining appeared stronger in  
260 large animals (*Figure 4C, right*) and the quantification of glycogen content in animal extracts by  
261 an enzyme-based assay (*Figure 4 – figure supplement 1D-F*) demonstrated a > 8-fold increase in  
262 the amount of glycogen/cell in large over small animals (*Figure 4*). Therefore, both the lipid and  
263 carbohydrates stores are strongly size-dependent in *S. mediterranea*, which conclusively  
264 confirms our model's prediction of size-dependent energy storage as a systems-level control  
265 paradigm of planarian growth and degrowth.

266

## 267 **Energy reserves and cell number govern Kleiber's law in planarians**

268 The size-dependent increase in the mass of lipid and glycogen stores is intriguing also in light of  
269 the previous indications that Kleiber's law in planarians might originate from a size-dependent  
270 increase in mass per cell, rather than a decrease in metabolic rate (*Figure 3D*). To explore this  
271 potential link between the regulation of growth dynamics and Kleiber's law, we first investigated  
272 the relative contributions of mass allometries to the emergence of the  $\frac{3}{4}$  exponent. As a direct  
273 test, we derived the size dependence of cell numbers versus mass, using the various scaling laws  
274 established during the course of this study. As shown in *Figure 5A*, cell numbers scale with wet  
275 and dry mass with scale exponents of  $0.74 \pm 0.01$  and  $0.72 \pm 0.01$ , respectively. This  
276 demonstrates that the mass per cell indeed increases disproportionately with size and with a very  
277 similar scaling exponent as for Kleiber's law (*Figure 1C*). In conjunction with the practically  
278 size-independent scaling of cell number and metabolic rate (*Figure 5B*, scaling exponent  $0.96 \pm$   
279  $0.02$ ), these data demonstrate conclusively that the  $\frac{3}{4}$  exponent of the metabolic rate/mass scaling  
280 law derives from the underlying scaling law of mass/cell.

281  
282 To quantitatively assess the contributions of energy stores to the mass/cell scaling exponent and  
283 thus to Kleiber's law, we analysed the composition of the dry mass in small, medium and large  
284 animals. In addition to storage lipids and glycogen, we quantified total protein (*Figure 5 – figure*  
285 *supplement 1A*), non-glycogen carbohydrates (*Figure 5 – figure supplement 1B-C*) and other  
286 polar and non-polar lipids (*Figure 4 – figure supplement 1B*). In comparison with the 8 and 88-  
287 fold increase of glycogen and TG contributions to dry mass/cell, the relative contribution of  
288 protein, other polar/non-polar lipids and non-glycogen carbohydrates varied less between small  
289 and large animals (*Figure 5C*). Our quantitative assays further allowed us to assess the absolute

290 mass contribution of each compound class to the size-dependent dry mass increase and thus to  
291 the origins of the  $\frac{3}{4}$  exponent. Intriguingly, the latter was largely explained by the mass of  
292 triglycerides and glycogen, with additional minor contributions from other carbohydrates,  
293 polar/non-polar lipids and protein (*Figure 5C*). Overall, our results therefore demonstrate that  
294 size-dependent energy storage causes Kleiber's law scaling in *S. mediterranea*.

295

296

## 297 **Discussion**

298 Here, we make use of the dramatic and reversible body size changes in the planarian *S.*  
299 *mediterranea* to probe the physiological basis of Kleiber's law. Contrary to comparative  
300 approaches that generally start from *a priori* assumptions and subsequently examine large multi-  
301 species data sets for supporting evidence, our finding that planarians obey Kleiber's law scaling  
302 allows us to bring an experimental approach in a model system to bear on the problem.  
303 Growth/degrowth in asexual planarians (e.g., the strain examined here) reversibly scales the size  
304 of a fully developed adult body plan. This likely exposes size-dependent physiological  
305 constraints more clearly than in other animals, where ontogenic growth is often accompanied by  
306 developmental changes. Our combination of quantitative and theoretical analysis of growth and  
307 degrowth dynamics demonstrate that Kleiber's law scaling in planarians originates not from a  
308 size-dependent decrease in specific metabolic rate, but from a size-dependent increase in average  
309 cellular mass. Further, our demonstration that the  $\frac{3}{4}$  exponent is largely caused by size-  
310 dependent lipid and glycogen stores firmly ties the physiological origins of planarian Kleiber's  
311 law scaling to energy metabolism. To our knowledge, our results provide a first experimentally  
312 founded demonstration of the physiological origins of Kleiber's law scaling in an animal species.

313

314 The fact that we find the cellular metabolic rate to be size-independent contrasts with multiple  
315 proposals that envisage the origins of Kleiber's law in a size-dependent decrease of cellular  
316 metabolic activity, e.g., by decreasing mitochondrial density (Smith, 1956). However, our use of  
317 microcalorimetry as a pathway-independent read-out of the post-absorptive metabolic rate leaves  
318 open the possibility of size-dependencies in the use of specific metabolic pathways. In this  
319 context, it is interesting to note that the ratio between our experimentally measured gross energy  
320 content (by bomb calorimetry) and net energy usage (modelling of growth dynamics data on  
321 basis of paradigm 3; *Figure 3B*) remains constant across the entire size range (*Figure 3F*). This  
322 entails that the metabolic processes that assimilate ingested food or catabolise energy stores are  
323 largely size-independent (constant food conversion rate of 2.6, in line with other aquatic  
324 organisms (Tacon & Metian, 2008); *Figure 3 – figure supplement 3F*). Instead, what changes in  
325 a size-dependent manner is the relative proportion of organismal energy resources that is  
326 channelled into the formation of metabolically active cells versus metabolically inert energy  
327 stores. While small planarians “invest” largely in new cells and little into stores, large animals  
328 predominantly store ingested food energy and produce few new cells. Allometric scaling of fat  
329 content with mass in mammals (Scale exponent 1.19 (Calder, 1984; Pitts & Bullard, 1968))  
330 raises the possibility that similar physiological trade-offs may contribute to  $P/M$  allometries in  
331 other animals.

332

333 Our demonstration of size-dependent energy storage as physiological cause of Kleiber's law in  
334 planarians also narrows the quest for a quantitative understanding of the  $3/4$  scale exponent.  
335 Interestingly, the trade-off between energy storage and addition of new cells converges on a

336 central premise of the Dynamic Energy Budget (DEB) theory, which can derive the  $\frac{3}{4}$  exponent  
337 out of the assumption of surface-limited energy store mobilization (Maino, Kearney, Nisbet, &  
338 Kooijman, 2014). However, planarians assimilate and distribute metabolic energy via the  
339 branched tubular network of their intestine (Forsthoefel, Park, & Newmark, 2011) (termed  
340 “gastrovasculature”). This also makes the intrinsic transport capacity limitations of space-filling  
341 fractal networks a possible origin of the  $\frac{3}{4}$  exponent, as per the WEB theory (Goefrey B West et  
342 al., 1997). Further, it is also conceivable that neither process is rate-limiting and that size-  
343 dependent energy storage emerges as a consequence of a size-dependence of stem cell division  
344 probabilities, for example. Importantly, our results establish an experimental system for the  
345 systematic experimental evaluation of these and other theories and thus also the mechanistic  
346 basis of Kleiber’s law.

347

348

## 349 **References**

350 Baguña, J. (1974). Dramatic mitotic response in planarians after feeding, and a hypothesis for the  
351 control mechanism. *Journal of Experimental Zoology*, 190(1), 117–122.

352 <http://doi.org/10.1002/jez.1401900111>

353 Baguña, J., Romero, R., Saló, E., Collet, J., Carme, A., Ribas, M., ... Bueno, D. (1990). Growth,  
354 degrowth and regeneration as developmental phenoma in adult freshwater planarians. In H.-  
355 J. Marthy (Ed.), *Experimental Embryology in Aquatic Plants and Animals* (Plenum Pre, pp.  
356 129–162). New York.

357 Banavar, J. R., Cooke, T. J., Rinaldo, A., & Maritan, A. (2014). Form, function, and evolution of  
358 living organisms. *Proceedings of the National Academy of Sciences*, 111(9), 3332–3337.



- 359 <http://doi.org/10.1073/pnas.1401336111>
- 360 Berthold, M. R., Cebren, N., Dill, F., Gabriel, T. R., Kötter, T., Meinl, T., ... Wiswedel, B.  
361 (2007). The Konstanz Information Miner. In W. Gaul, M. Vichi, & C. Weihs (Eds.), *Studies*  
362 *in Classification, Data Analysis, and Knowledge Organization* (pp. 319–326). Springer.
- 363 Bianconi, E., Piovesan, A., Facchin, F., Beraudi, A., Casadei, R., Frabetti, F., ... Canaider, S.  
364 (2013). An estimation of the number of cells in the human body. *Annals of Human Biology*,  
365 *40*(6), 463–471. <http://doi.org/10.3109/03014460.2013.807878>
- 366 Birsoy, K., Festuccia, W. T., & Laplante, M. (2013). A comparative perspective on lipid storage  
367 in animals. *Journal of Cell Science*, *126*(7), 1541–1552. <http://doi.org/10.1242/jcs.104992>
- 368 Blaxter, K. (1989). *Energy Metabolism in Animals and Man*. Cambridge University Press.  
369 Retrieved from <https://books.google.de/books?id=mAw5AAAAIAAJ>
- 370 Bligh, E. G., & Dyer, W. J. (1959). A rapid method of total lipid extraction and purification.  
371 *Canadian Journal of Biochemistry and Physiology*, *37*(8), 911–917.  
372 <http://doi.org/dx.doi.org/10.1139/cjm2014-0700>
- 373 Brody, S. (1945). *Bioenergetics and Growth: With Special Reference to the Efficiency Complex*  
374 *in Domestic Animals*. New York: Van Nostrand Reinhold.
- 375 Calder, W. A. (1984). *Size, Function, and Life History*. Cambridge, MA: Harvard University  
376 Press.
- 377 Carpenter, A. E., Jones, T. R., Lamprecht, M. R., Clarke, C., Kang, I. H., Friman, O., ...  
378 Sabatini, D. M. (2006). CellProfiler: image analysis software for identifying and  
379 quantifying cell phenotypes. *Genome Biology*, *7*(10), R100. [17](http://doi.org/10.1186/gb-2006-</a></p></div><div data-bbox=)

- 380 7-10-r100
- 381 Dall, W. (1986). Estimation of routine metabolic-rate in a penaeid prawn, *Penaeus-Esculentus*
- 382 Haswell. *Journal of Experimental Marine Biology and Ecology*, 96(1), 57–74.
- 383 [http://doi.org/10.1016/0022-0981\(86\)90013-4](http://doi.org/10.1016/0022-0981(86)90013-4)
- 384 Daly, J. J., & Matthews, H. M. (1982). Effect of weight and temperature upon oxygen
- 385 consumption of the land planarian *bipalium kewense*. *Physiological Zoology*, 55(2), 148–
- 386 154.
- 387 Davison, J. (1955). Body weight, cell surface, and metabolic rate in anuran amphibia. *The*
- 388 *Biological Bulletin*, 109(3), 407–419. <http://doi.org/10.2307/1539173>
- 389 Forsthoefel, D. J., Park, A. E., & Newmark, P. A. (2011). Stem cell-based growth, regeneration,
- 390 and remodeling of the planarian intestine. *Developmental Biology*, 356(2), 445–459.
- 391 <http://doi.org/10.1016/j.ydbio.2011.05.669>
- 392 Glazier, D. S. (2005). Beyond the variation in the intra- and interspecific scaling of metabolic
- 393 rate in animals. *Biological Reviews*, 80, 611–662.
- 394 <http://doi.org/10.1017/S1464793105006834>
- 395 Hemmingsen, A. M. (1960). *Energy metabolism as related to body size and respiratory surfaces*
- 396 *and its evolution. Reports of the Steno Memorial Hospital and then Nordisk*
- 397 *Insulinlaboratorium Gentofte, Denmark*. Copenhagen: Nordisk Insulinlaboratorium;
- 398 Gentofte and Strodam Biological Laboratory; Hillerod.
- 399 Herzog, R., Schuhmann, K., Schwudke, D., Sampaio, J. L., Bornstein, S. R., Schroeder, M., &
- 400 Shevchenko, A. (2012). LipidXplorer: a software for consensual cross-platform lipidomics.

- 401 *PloS One*, 7(1), e29851. <http://doi.org/10.1371/journal.pone.0029851>
- 402 Hou, C., Zuo, W., Moses, M. E., Woodruff, W. H., Brown, J. H., & West, G. B. (2008). Energy  
403 uptake and allocation during ontogeny. *Science*, 322(5902), 736–739.  
404 <http://doi.org/10.1126/science.1162302>
- 405 Hyman, L. H. (1919). Physiological studies on planaria. III oxygen consumption in relation to  
406 age (size) differences. *Biological Bulletin*, 37(6), 388–403. Retrieved from  
407 <http://www.jstor.org/stable/1536374>
- 408 Ke, M.-T., Fujimoto, S., & Imai, T. (2013). SeeDB : a simple and morphology-preserving optical  
409 clearing agent for neuronal circuit reconstruction. *Nature Neuroscience*, 16(8), 1154–1161.  
410 <http://doi.org/10.1038/nn.3447>
- 411 Kemp, R. B., & Guan, Y. (1997). Heat flux and the calorimetric-respirometric ratio as measures  
412 of catabolic flux in mammalian cells. *Thermochimica Acta*, 300(1–2), 199–211.  
413 [http://doi.org/10.1016/S0040-6031\(96\)03125-5](http://doi.org/10.1016/S0040-6031(96)03125-5)
- 414 King, R. S., & Newmark, P. A. (2013). In situ hybridization protocol for enhanced detection of  
415 gene expression in the planarian *Schmidtea mediterranea*. *BMC Developmental Biology*,  
416 13(1), 8. <http://doi.org/10.1186/1471-213X-13-8>
- 417 Kleiber, M. (1932). Body size and metabolism. *Hilgardia: A Journal of Agricultural Science*,  
418 6(11), 315–353. <http://doi.org/10.1017/CBO9781107415324.004>
- 419 Kleiber, M. (1961). *The Fire of Life: an Introduction to Animal Energetics*. New York: Wiley.  
420 Retrieved from <https://books.google.de/books?id=pctqAAAAMAAJ>
- 421 Kooijman, S. A. L. M. (2009). *Dynamic Energy Budget theory for metabolic organisation*.

- 422 Cambridge: Cambridge University Press. Retrieved from  
423 <http://ebooks.cambridge.org/ref/id/CBO9780511805400>
- 424 Kozlowski, J., & Weiner, J. (1997). Interspecific allometries are by-products of body size  
425 optimization. *The American Naturalist*, 149(2), 352–380.  
426 <http://doi.org/https://doi.org/10.1086/285994>
- 427 Maino, J. L., Kearney, M. R., Nisbet, R. M., & Kooijman, S. A. L. M. (2014). Reconciling  
428 theories for metabolic scaling. *Journal of Animal Ecology*, 83(1), 20–29.  
429 <http://doi.org/10.1111/1365-2656.12085>
- 430 Mak, H. Y. (2012). Lipid droplets as fat storage organelles in *Caenorhabditis elegans*. *Journal of*  
431 *Lipid Research*, 53(1), 28–33. <http://doi.org/10.1194/jlr.R021006>
- 432 Makarieva, A. M., Gorshkov, V. G., Li, B.-L., Chown, S. L., Reich, P. B., & Gavrilov, V. M.  
433 (2008). Mean mass-specific metabolic rates are strikingly similar across life's major  
434 domains: Evidence for life's metabolic optimum. *Proceedings of the National Academy of*  
435 *Sciences of the United States of America*, 105(44), 16994–9. Copyright (2008) National  
436 Academy of Sciences. <http://doi.org/10.1073/pnas.0802148105>
- 437 McDonald, P. (2002). *Animal Nutrition*. Pearson Education. Retrieved from  
438 <https://books.google.de/books?id=jxUXns9laAEC>
- 439 McMahon, T. (1973). Size and shape in biology. *Science*, 179(4079), 1201-12–4.  
440 <http://doi.org/10.1126/science.179.4079.1201>
- 441 Mulisch, M., & Welsch, U. (Eds.). (2010). *Romeis - Mikroskopische Technik* (18th ed.). Berlin  
442 Heidelberg: Spektrum Akademischer Verlag (Springer).

- 443 Nutrient report of calf liver. (2016). Retrieved February 7, 2018, from  
444 <https://ndb.nal.usda.gov/ndb/foods/show/5301?n1=%7BQv%3D1%7D&fgcd=&man=&lfac>  
445 [et=&count=&max=50&sort=default&qlookup=calf+liver&offset=&format=Full&new=&m](https://ndb.nal.usda.gov/ndb/foods/show/5301?n1=%7BQv%3D1%7D&fgcd=&man=&lfacet=&count=&max=50&sort=default&qlookup=calf+liver&offset=&format=Full&new=&measureby=&Qv=1&ds=&qt=&qp=&qa=&qn=&q=&ing=)  
446 [easureby=&Qv=1&ds=&qt=&qp=&qa=&qn=&q=&ing=](https://ndb.nal.usda.gov/ndb/foods/show/5301?n1=%7BQv%3D1%7D&fgcd=&man=&lfacet=&count=&max=50&sort=default&qlookup=calf+liver&offset=&format=Full&new=&measureby=&Qv=1&ds=&qt=&qp=&qa=&qn=&q=&ing=)
- 447 Overmoyer, B. A., McLaren, C. E., & Brittenham, G. M. (1987). Uniformity of liver density and  
448 nonheme (storage) iron distribution. *Arch Pathol Lab Med*, *111*(6), 549–54.
- 449 Pearson, B. J., Eisenhoffer, G. T., Gurley, K. A., Rink, J. C., Miller, D. E., & Alvarado, A. S.  
450 (2009). Formaldehyde-based whole-mount in situ hybridization method for planarians.  
451 *Developmental Dynamics*, *238*(2), 443–450. <http://doi.org/10.1002/dvdy.21849>
- 452 Peters, R. H. (1983). *The Ecological Implications of Body Size*. Cambridge: Cambridge  
453 University Press. <http://doi.org/doi:10.1017/CBO9780511608551>
- 454 Pitts, G. C., & Bullard, T. R. (1968). Some interspecific aspects of body composition in  
455 mammals. In *Body Composition in Animals and Man* (pp. 45–70). Washington, D.C.:  
456 National Academy of Science, Pub No 1598.
- 457 Purves, W. K., & Sadava, D. (2004). *Life: The Science of Biology* (7th ed.). New York: Freeman.
- 458 Rasouli, M., Shokri-Afra, H., & Ostovar-Ravari, A. (2015). A new protocol for separation of  
459 acid soluble and insoluble fractions from total glycogen and simultaneous measurements.  
460 *European Review for Medical and Pharmacological Sciences*, *19*(10), 1785–1789.
- 461 Reddien, P. W., & Alvarado, A. S. (2004). Fundamentals of planarian regeneration. *Annu. Rev.*  
462 *Cell Dev. Biol*, *20*, 725–57. <http://doi.org/10.1146/annurev.cellbio.20.010403.095114>
- 463 Rink, J. C. (2012). Stem cell systems and regeneration in planaria. *Development Genes and*

- 464 *Evolution*. <http://doi.org/10.1007/s00427-012-0426-4>
- 465 Romero, R., & Baguñà, J. (1991). Quantitative cellular analysis of growth and reproduction in  
466 freshwater planarians (Turbellaria; Tricladida). I. A cellular description of the intact  
467 organism. *Invertebrate Reproduction & Development*, 19(2), 157–165.  
468 <http://doi.org/10.1080/07924259.1991.9672170>
- 469 Sales, S., Graessler, J., Ciucci, S., Al-Atrib, R., Vihervaara, T., Schuhmann, K., ... Shevchenko,  
470 A. (2016). Gender, contraceptives and individual metabolic predisposition shape a healthy  
471 plasma lipidome. *Scientific Reports*, 6(May), 27710. <http://doi.org/10.1038/srep27710>
- 472 Sales, S., Knittelfelder, O., & Shevchenko, A. (2017). Lipidomics of Human Blood Plasma by  
473 High-Resolution Shotgun Mass Spectrometry. In *Methods in Molecular Biology* (Vol. 1619,  
474 pp. 203–212). [http://doi.org/10.1007/978-1-4939-7057-5\\_16](http://doi.org/10.1007/978-1-4939-7057-5_16)
- 475 Saló, E., & Agata, K. (2012). The planaria model system. *The International Journal of*  
476 *Developmental Biology*, 56, 1–4. <http://doi.org/10.1387/ijdb.123495es>
- 477 Schindelin, J., Arganda-Carreras, I., Frise, E., Kaynig, V., Longair, M., Pietzsch, T., ... Cardona,  
478 A. (2012). Fiji: an open-source platform for biological-image analysis. *Nature Methods*,  
479 9(7), 676–682. <http://doi.org/10.1038/nmeth.2019>
- 480 Schmidt-Nielsen, K. (1984). *Scaling: Why is Animal Size so Important?* New York: Cambridge  
481 University Press. [http://doi.org/10.1016/0166-2236\(85\)90197-3](http://doi.org/10.1016/0166-2236(85)90197-3)
- 482 Schuhmann, K., Almeida, R., Baumert, M., Herzog, R., Bornstein, S. R., & Shevchenko, A.  
483 (2012). Shotgun lipidomics on a LTQ Orbitrap mass spectrometer by successive switching  
484 between acquisition polarity modes. *Journal of Mass Spectrometry*, 47(1), 96–104.

- 485 <http://doi.org/10.1002/jms.2031>
- 486 Schuhmann, K., Thomas, H., Ackerman, J. M., Nagornov, K. O., Tsybin, Y. O., & Shevchenko,  
487 A. (2017). Intensity-independent noise filtering in FT MS and FT MS / MS spectra for  
488 shotgun lipidomics. *Analytical Chemistry*, (89), 7046–7052.  
489 <http://doi.org/10.1021/acs.analchem.7b00794>
- 490 Sears, R., & Calambokidis, J. (2002). *COSEWIC Assessment and Update Status Report on the*  
491 *Blue Whale Balaenoptera musculus Atlantic population / Pacific population in Canada.*
- 492 Smith, R. E. (1956). Quantitative relations between liver mitochondria metabolism and total  
493 body weight in mammals. *Annals of the New York Academy of Sciences*, 62(17), 505–421.  
494 <http://doi.org/10.1111/j.1749-6632.1956.tb35360>
- 495 Spandl, J., White, D. J., Peychl, J., & Thiele, C. (2009). Live cell multicolor imaging of lipid  
496 droplets with a new dye, LD540. *Traffic*, 10(11), 1579–1584. [http://doi.org/10.1111/j.1600-](http://doi.org/10.1111/j.1600-0854.2009.00980.x)  
497 [0854.2009.00980.x](http://doi.org/10.1111/j.1600-0854.2009.00980.x)
- 498 Staudt, T., Lang, M. C., Medda, R., Engelhardt, J., & Hell, S. W. (2007). 2,2'-Thiodiethanol : a  
499 new water soluble mounting medium for high resolution optical microscopy. *Microscopy*  
500 *Research and Technique*, 70(1), 1–9. <http://doi.org/10.1002/jemt>
- 501 Tacon, A. G. J., & Metian, M. (2008). Global overview on the use of fish meal and fish oil in  
502 industrially compounded aquafeeds: Trends and future prospects. *Aquaculture*, 285(1–4),  
503 146–158. <http://doi.org/10.1016/j.aquaculture.2008.08.015>
- 504 Takeda, H., Nishimura, K., & Agata, K. (2009). Planarians maintain a constant ratio of different  
505 cell types during changes in body size by using the stem cell system. *Zoological Science*,

- 506 26(12), 805–13. <http://doi.org/10.2108/zsj.26.805>
- 507 Tejada-Romero, B., Evans, D. J., & Aboobaker, A. A. (2012). FACS analysis of the planarian  
508 stem cell compartment as a tool to understand regenerative mechanisms. *Methods in*  
509 *Molecular Biology*, 916, 47–57. <http://doi.org/10.1007/978-1-61779-980-8>
- 510 Werner, S., Rink, J. C., Riedel-Kruse, I. H., & Friedrich, B. M. (2014). Shape mode analysis  
511 exposes movement patterns in biology: Flagella and flatworms as case studies. *PLoS ONE*,  
512 9(11), 1–21. <http://doi.org/10.1371/journal.pone.0113083>
- 513 West, G. B. (1999). The origin of universal scaling laws in biology. *Physica A*, 263, 104–113.
- 514 West, G. B., & Brown, J. H. (2005). The origin of allometric scaling laws in biology from  
515 genomes to ecosystems: towards a quantitative unifying theory of biological structure and  
516 organization. *Journal of Experimental Biology*, 208(9), 1575–1592.  
517 <http://doi.org/10.1242/jeb.01589>
- 518 West, G. B., Brown, J. H., & Enquist, B. J. (1997). A general model for the origin of allometric  
519 scaling laws in biology. *Science*, 276(5309), 122–126.  
520 <http://doi.org/10.1126/science.276.5309.122>
- 521 Whitfield, J. (2006). *In the Beat of a Heart: Life, Energy, and the Unity of Nature*. Washington,  
522 DC: Joseph Henry Press. <http://doi.org/10.17226/11634>

523

## 524 **Acknowledgements**

525 We thank N. Alt, J. Richter, J. Ferria, A. Mishra, M. Toth and I. Smith for size quantifications,  
526 K.-O. Linde and IKA Werke GmbH & Co. for microcalorimetry support, Passant Atallah (IPF



527 Dresden) and Michał Surma (Lipotype GmbH) for support with the animal mass measurements  
528 and H. Andreas and S. von Kannen for technical support. We thank the CMCB technology  
529 platform TU Dresden (EM and Histology) and the following MPI-CBG core facilities for their  
530 support: Cell technologies, Technology development studio, and scientific computing.

531

532

### 533 **Author Contributions**

534 Conceptualization: A.T., S.W., O.F., J.C.R., B.M.F., F.J.; methodology: A.T., O.F., S.W., Y.Q,  
535 O.K.; formal analysis: S.W., A.T., O.F., O.K.; investigation: A.T., O.F., S. W., J.P., O.K., Y.Q.;  
536 software: S.W.; resources: J.C.R., K.F., A.S., F.S.; data curation: S.W., A.T., O.F., O.K.; writing  
537 – original draft: A.T., S. W., O.F., J.C.R.; writing – review & editing: J.C.R., F.J., B.M.F., A.T.,  
538 S.W., O.F., J.P., K.F., O.K., A.S.; visualization: A.T., S.W., O.F.; funding acquisition: J.C.R.,  
539 F.J., B.M.F.; K.F. All authors read and approved of the manuscript.

540

### 541 **Competing interests**

542 The authors declare no competing financial interests.

543

### 544 **Data and materials availability**

545 All data on which the conclusions of this paper are based are presented in the figures, figure  
546 supplements or source data that was submitted with this manuscript.

547

## 548 **Materials and Methods**

### 549 Fitting of power laws

550 Power law exponents were obtained from linear fits (robust regression using a bisquare weighing  
551 function, “robustfit” function in MATLAB) in the log-log plot. We only directly fitted the  
552 measured data. If a data set is derived from several measurements (e.g. metabolic rate vs. wet  
553 mass is derived from measurements of metabolic rate vs. dry mass and dry mass vs. wet mass),  
554 the power law estimate is computed from the original fits of the individual measurements. The  
555 respective standard error is obtained via error propagation.

556

### 557 Animal husbandry

558 The asexual (CIW4) strain of *S. mediterranea* was kept in plastic containers in 1X Montjuïc salt  
559 water (1.6 mM NaCl, 1.0 mM CaCl<sub>2</sub>, 1.0 mM MgSO<sub>4</sub>, 0.1 mM MgCl<sub>2</sub>, 0.1 mM KCl, 1.2 mM  
560 NaHCO<sub>3</sub>) with 25 mg/L gentamycin sulfate. The animals were fed homogenized organic calf  
561 liver paste and were fed at least one week prior to all experiments if not otherwise indicated.  
562 Animals were kept at 20 °C before and during experiments.

563

### 564 Measurement of planarian body size

565 Movies of gliding planarians were taken with a Nikon Multizoom AZ 100M (0.5x objective)  
566 using dark field illumination (facilitates planarian body segmentation). The following camera  
567 (DS-Fi1) settings were used: frame rate 3 Hz, exposure time 6 ms, 15 s movie length, 1280 x  
568 960-pixel resolution, conversion factor 44 pixel/mm. Animals were placed one at a time inside a  
569 Petri dish and typically 1 - 4 movies taken, depending on the animal's behaviour. Movies were  
570 converted from AVI to MP4 format using Handbreak to reduce the file size. Movies were

571 subsequently analysed using custom-made MATLAB software (MathWorks, Natick,  
572 Massachusetts, USA). Typically, those frames were analysed in which the animals were gliding  
573 in a straight line (typically 10 frames). See also (Werner et al., 2014).

574

#### 575 Microcalorimetry

576 Size-matched planarians were placed inside 4 ml glass ampoules (TA Instruments, Cat. No.:  
577 24.20.0401) partially filled with 2 ml of planarian water and supplemented with 10 mM HEPES  
578 for improved buffering. No HEPES was used in 22 out of 82 samples, however, no difference in  
579 animal health and/or heat generation was observed (data not shown). The ampoules were sealed  
580 with aluminium Caps (TA Instruments, Cat. No.: 86.33.0400) using a dedicated crimping tool  
581 (TA Instruments, cat. #: 3339). The measurements were performed in a multichannel  
582 microcalorimeter (TAMIII, TA Instruments), whereby 12 samples were measured  
583 simultaneously including 1-2 controls without animals. The ampoules were first inserted half  
584 way and kept in this position for 15 min in order to equilibrate with the temperature inside the  
585 device. Then, ampoules were placed completely inside the respective channels whereby they  
586 were sitting on top of a thermoelectric detector that measured the heat production in relation to  
587 an oil bath, which was kept at a constant temperature of 20 °C. Before the actual measurements,  
588 the system was left to equilibrate for another 45 min. The measurements lasted between 2-3  
589 days. Animal behaviour was not controlled and the animals were able to freely move inside the  
590 ampoule. Immediately after the metabolic rate measurements, animal dry mass was determined  
591 by drying over night at 60 °C either on weighing paper or inside 0.5 ml tubes and subsequent  
592 weighing on a microbalance (RADWAG MYA 5.2Y). The mass per animal was obtained by  
593 dividing the collective mass by the number of animals.

594 Cell counting based on Histone H3 protein quantification

595 Generating standard curves for converting Histone H3 content into cell number: cells from 15  
596 animals (length 5-8 mm) were dissociated and counted out by FACS essentially as previously  
597 described (Tejada-Romero, Evans, & Aboobaker, 2012). Following enzymatic digestion of the  
598 tissue, the resulting cell suspension was filtered through a CellTrics 50  $\mu\text{m}$  mesh (Partec, Cat.  
599 No.: 04-0042-2317) and incubated in Hoechst (33342) for 1.5 h on a rotator. Subsequently, cells  
600 were pelleted once (700 rpm, 10 min) and the supernatant replaced with fresh CMFH. The  
601 volume was adjusted to obtain a cell concentration suitable for FACS (typically  $1\text{-}5\cdot 10^6$   
602 cells/ml). Following cell sorting, cells were kept on ice until further processing. Cells were  
603 counted with a FACS ARIA III cell sorter (Beckton Dickinson) with standard filter settings and  
604 sorted into 2 ml tubes. Typically,  $10^5$  cells were sorted per tube. Following FACS, cells were  
605 frozen at  $-80^\circ\text{C}$  until further use.

606 Determination of total cell number in different-sized planarians using quantitative Western  
607 blotting: plan area was measured using above-mentioned method (see also *Figure 2 – figure*  
608 *supplement 1A-C*). Subsequently, individual animals were lysed in 6 M Urea, 2% SDS, 130 mM  
609 DTT, 1  $\mu\text{g}/\text{ul}$  BSA, 1  $\mu\text{g}/\text{ul}$  BSA-AlexaFluor680 conjugate (ThermoFisher Scientific, Ca. No.:  
610 A34787), protease inhibitor cocktail and  $\geq 2.5$  U/ml Benzonase Nuclease (SIGMA, Cat. No.:  
611 E1014). Lysis was allowed to proceed for 1 - 1.5 h at room temperature, remaining tissue pieces  
612 were completely lysed by tapping the tubes and vortexing. Meanwhile, the cells for the standard  
613 curve (see above) were lysed by directly applying the lysis solution onto the frozen cells. Protein  
614 concentrations were measured in 1:5 or 1:10 dilutions using a NanoDrop spectrophotometer  
615 (Thermo Fisher Scientific) (absorbance at 280 nm). Finally, the samples were mixed with 4x  
616 Laemmli buffer (4x stock: 400 mM DTT, 200 mM Tris-HCl, 8% SDS, 40% glycerol, 0.5 mg/ml

617 Bromophenol Blue) and incubated for 10 min at 60 °C before spinning down at 13000 rpm for 5  
618 min. The samples were run on NuPAGE Novex 4-12% Bis-Tris protein gels (Invitrogen, Cat.  
619 No.: NP0322BOX) in 1x MOPS running buffer (ThermoFisher Scientific, Cat. No.: NP0001).  
620 The loaded volumes for the standard curve corresponded to 15000, 22500, 30000, 37500 and  
621 45000 cells (linear signal range) and the volume of the whole-animal lysates was corresponding  
622 to 50 µg of protein, ensuring that the samples were lying within the range of the standard curve.  
623 4 technical replicates were carried out per experiment (analysis of 5 individual animals) by  
624 running 2 chambers with 2 gels each at 140 mA for 1 h. Proteins were transferred onto Whatman  
625 Protran nitrocellulose membrane (SIGMA, Cat. No.: Z613630) for 2 h in transfer buffer (20%  
626 MeOH/1x MOPS). Membranes were blocked for 1 h at room temperature and continuous  
627 agitation in 1x TBS-T (10 mM Tris base, 150 mM NaCl, 0.1% (w/v) Tween-20, pH 7.4) and 5%  
628 (w/v) nonfat dry milk. Afterwards, membranes were incubated over night at 4 °C with anti-  
629 Histone H3 antibody (Abcam, Cat. No.: ab1791) followed by at least 3 washes in TBS-T for 10  
630 min. Membranes were then incubated with a fluorophore-conjugated secondary antibody (anti-  
631 rabbit IRDye 680LT, LICOR, Cat. No.: 926-68023) diluted 1:20000 in blocking solution  
632 followed by extensive washing in TBS-T (1x 5 min, 3x 10 min) and one final wash step in TBS  
633 (10 min). Afterwards, membranes were dried at room temperature for at least 1 h and imaged on  
634 an Odyssey SA Li-Cor Infrared Imaging System (LICOR). The relative fluorescent band  
635 intensity was quantified using the gel-analysing tool in Fiji (Schindelin et al., 2012). The fraction  
636 of cells from whole-animal lysates loaded onto the gel was calculated from the standard curve on  
637 each blot separately. The total number of cells in the animals was calculated as follows: number  
638 of cells loaded/volume loaded x total volume of original lysate. The obtained values were finally  
639 averaged over all 4 technical replicates.

640 Image-based cell counting

641 First, plan area of individual animals was measured using above-mentioned method (see also  
642 *Figure 2 – figure supplement 1A-C*). For cell dissociation, individual animals were placed inside  
643 maceration solution (Romero & Baguña, 1991) (acetic acid, glycerol, dH<sub>2</sub>O at a ratio of 1:1:13  
644 including 1 µg/ml BSA + 10 µg/ml Hoechst 33342, no methanol) and the total volume adjusted  
645 according to animal size. The solution also contained typically about  $1.3 \times 10^6$  fluorescent  
646 beads/ml (FluoSpheres Sulfate Microspheres, 4 µm, red fluorescent 580/605 nm, ThermoFisher  
647 Scientific, Cat. No.: F8858) the concentration of which was determined with a Neubauer  
648 chamber for each experiment (including 10-18 animals). Dissociation was allowed to proceed at  
649 room temperature for about 15 min after which cells of remaining tissue clumps were further  
650 dissociated by tapping and vortexing. Per animal, 2 µl drops of the cell suspension were pipetted  
651 into 6-10 wells of a glass bottom 96-well plate (Greiner, Cat. No.: 655090) and the drops dried  
652 over night at room temperature. Subsequently, the entire drops were imaged on an Operetta high-  
653 content imaging system (PerkinElmer). The number of cells and beads were automatically  
654 counted using an imaging pipeline built in CellProfiler (Carpenter et al., 2006) (*Figure 2 – figure  
655 supplement 2*). The total number of cells was calculated from each separate well/drop by the  
656 following formula: sum of cells in analysed images/sum of beads in analysed images x known  
657 total number of beads in original cell suspension. For each animal, the calculated total cell  
658 number was averaged across 9-10 wells.

659

660 Measurement of energy content using a bomb calorimeter

661 Size-matched planarians were placed inside a combustion crucible and lyophilized overnight in a  
662 lyophiliser (Heto LyoLab 3000). Then, the samples were weighed on an analytical balance

663 (Sartorius Entris, readability: 0.1 mg) and the mass per animal was obtained by dividing the  
664 collective mass by the number of animals – thus, allowing further conversion into organismal  
665 cell numbers. Afterwards, the combustion enthalpy was measured by combustion in the presence  
666 of high pressure O<sub>2</sub> inside a bomb calorimeter (IKA C 6000 global standards) running in  
667 adiabatic mode. Benzoic acid pellets (IKA C723, Cat. No.: 0003243000) were used as a standard  
668 for calibration as well as a burning aid for the samples. In between lyophilizing and combustion,  
669 the samples were kept inside a drying chamber to prevent humidification.

670

#### 671 Dry and wet mass measurements

672 To obtain the dry mass versus area and dry mass versus length scaling laws, the plan area of  
673 individuals animals was measured using aforementioned method. Afterwards, animals were  
674 individually placed on round pre-weighed glass cover slips and dried over night at approximately  
675 60 °C. Subsequently, each animal was weighed 3 times on an analytical microbalance (Sartorius  
676 Research 210 P) to obtain an average mass value. Wet mass was measured by removing as much  
677 of residual water as possible while individual animals were placed inside a 0.5 ml tube. After  
678 further exposing the animals to air for 30-40 min to evaporate remaining water outside of the  
679 animal, animals were weighed on a microbalance (RADWAG MYA 5.2Y).

680

#### 681 Food intake assay

682 Plan area of individual animals (two and three weeks starved) was measured using the above-  
683 mentioned method (see also *Figure 2 – figure supplement 1A-C*). Planarians were fed with  
684 organic homogenized calf liver paste, which was mixed with about  $6.5 \cdot 10^5$  per 1  $\mu$ l liver red  
685 fluorescence beads (FluoSpheres Sulfate Microspheres, 4  $\mu$ m, fluorescent 580/605 nm,

686 ThermoFisher Scientific, Cat. No.: F8858) coated in 1mg/ml BSA. Single animals (or for  
687 calibration 2  $\mu$ l of liver/beads mix) were dissociated into single cells in maceration solution (see  
688 above) containing 0.1% Tween-20 and about 300/ $\mu$ l yellow-green fluorescence beads  
689 (FluoSpheres Sulfate Microspheres, 4  $\mu$ m, fluorescent 505/515 nm, ThermoFisher Scientific,  
690 Cat. No.: F8859) for volume normalization (see further below). 1  $\mu$ l drops of the animal and liver  
691 macerates as well as from maceration solution only were distributed into 10 wells of a glass  
692 bottom 96-well plate (Greiner, Cat. No.: 655090) and dried over night at room temperature in the  
693 dark. Whole drops were imaged on an Operetta high content imaging system (PerkinElmer) and  
694 the number of red and yellow-green beads were automatically counted using CellProfiler  
695 (Carpenter et al., 2006). The volume of liver eaten per animal was calculated as follow:

- 696 1. Total number of red beads per 1 animal = Number of red beads in 1  $\mu$ l drop of worm  
697 suspension x Total volume of original maceration solution
- 698 2. Total number of red beads per 1  $\mu$ l liver = (Number of red beads in 1  $\mu$ l drop of liver  
699 suspension / 2) x Volume of maceration solution
- 700 3. Volume of liver eaten per animal = Total number of red beads per 1 animal / Total  
701 number of red beads per 1  $\mu$ l liver

702 To account for possible pipetting errors leading to variation in drop volumes, the volume of liver  
703 eaten per animal was normalized to the ratio between yellow-green beads in the drops of the  
704 animal macerate and in the drops of maceration solution only.

705

#### 706 Lipid droplet stain

707 Two weeks starved small worms were killed in 5 % N-Acetyl-Cystein (NAC) and large worms  
708 in 7.5 % NAC (5 min at room temperature) and fixed in 4 % PFA for 2 days at 4°C. Fixed worms



709 were embedded in 4 % low-melting-point agarose and sectioned using a vibratome (100  $\mu$ m,  
710 Leica, Germany). Sections were treated with 0.5 % Triton X-100 in PBS for 2h and incubated in  
711 PBS with lipid droplet dye LD540 (kind gift from Christoph Thiele, Bonn) (0.5  $\mu$ g/ml) and  
712 DAPI (1  $\mu$ g/ml) overnight at room temperature. After thoroughly washing with 0.3% Triton X-  
713 100 in PBS and a short rinse in PBS, the sections were optically cleared with the slightly  
714 modified SeeDB protocol (Ke, Fujimoto, & Imai, 2013) as follows: Sections were incubated  
715 sequentially with increasing concentrations of aqueous fructose solution (25 % for 4 h, 50 % for  
716 4 h, 75 % and 100 % fructose for overnight) and finally with the saturated fructose solution  
717 overnight. All steps were carried out at room temperature. The sections were mounted on glass  
718 slides with the SeeDB solution and confocal images were taken on a Zeiss LSM 700 inverted  
719 microscope (20x objective, Zeiss Plan-Apochromat, 0.8 numerical aperture) using 80 % 2,2'-  
720 Thiodiethanol (Staudt, Lang, Medda, Engelhardt, & Hell, 2007) as immersion media.

721

#### 722 Lipid extraction and quantification by shotgun mass spectrometry

723 Synthetic lipid standards were purchased from Avanti Polar Lipids, Inc. (Alabaster, AL, USA).  
724 Stocks of internal standards were stored in glass ampoules at -20°C until used for lipid  
725 extraction. Planarians of different size (40 small, length ~ 4 mm; 20 medium, ~ 8 mm; and 6  
726 large, ~ 16 mm) were pooled and homogenized in ice-cold isopropanol mixed with acetonitrile  
727 (1:1). Analysis of lipid extracts obtained under different homogenization conditions to prevent  
728 TG degradation (*Figure 4 – figure supplement 1*) was performed on HPTLC silica gel plates  
729 (Merck, Cat.No.: 105633) with the solvent system n-hexane/diethylether/acetic acid (70:30:1,  
730 vol/vol/vol). Lipids were visualized by spraying plates with 3 g cupric acetate in 100 ml of  
731 aqueous 10 % phosphoric acid solution and heating at 180 °C for 10 min. Protein amount in the

732 homogenates was determined by BCA. 50 µg of total protein was extracted with MTBE/MeOH  
733 as described in (Sales et al., 2016; Sales, Knittelfelder, & Shevchenko, 2017; Schuhmann et al.,  
734 2012). Briefly, 700 µl of 10:3 MTBE/MeOH containing one internal standard for each lipid class  
735 was added to the dried homogenates. Samples were vortexed for 1h at 4 °C. Phase separation  
736 was induced by adding 140 µl of water and vortexing for 15 min at 4 °C, followed by  
737 centrifugation at 13400 rpm for 15 min. The upper phase was collected, evaporated and  
738 reconstituted in 600 µl of 2:1 MeOH/CHCl<sub>3</sub>. 15 µl of total lipid extract was diluted with 85 µl  
739 4:2:1 IPA/MeOH/CHCl<sub>3</sub> containing 7.5 mM ammonium formate for mass spectrometric  
740 analysis. For the measurement of phosphatidylserines (PS), 15 µl of lipid extract were diluted  
741 with 85 µl 4:1 EtOH/CHCl<sub>3</sub> containing 0.1% triethylamine.

742 Mass spectrometric analysis was performed on a Q Exactive instrument (Thermo Fischer  
743 Scientific, Bremen, Germany) equipped with a robotic nanoflow ion source TriVersa NanoMate  
744 (Advion BioSciences, Ithaca, NY, USA) using nanoelectrospray chips with a diameter of 4.1  
745 µm. The ion source was controlled by the Chipsoft 8.3.1 software (Advion BioSciences).  
746 Ionization voltage was + 0.96 kV in positive and – 0.96 kV in negative mode; backpressure was  
747 set at 1.25 psi in both modes by polarity switching (Schuhmann et al., 2012). The temperature of  
748 the ion transfer capillary was 200 °C; S-lens RF level was set to 50 %. Each sample was  
749 analysed for 5.7 min. FTMS spectra were acquired within the range of m/z 400–1000 from 0 min  
750 to 1.5 min in positive and within the range of m/z 350–1000 from 4.2 min to 5.7 min in negative  
751 mode at a mass resolution of  $R_{m/z\ 200} = 140000$ , automated gain control (AGC) of  $3 \times 10^6$  and  
752 with a maximal injection time of 3000 ms. Free cholesterol was quantified by parallel reaction  
753 monitoring FT MS/MS within runtime 1.51 to 4.0 min. For FT MS/MS micro scans were set to  
754 1, isolation window to 0.8 Da, normalized collision energy to 12.5%, AGC to  $5 \times 10^4$  and

755 maximum injection time to 3000 ms. PS was measured for 1.5 min in an additional acquisition in  
756 negative FTMS mode with optimized nanoMate parameters (backpressure 1.00 psi and voltage –  
757 2.00 kV). All acquired data was filtered by PeakStrainer ([https://git.mpi-](https://git.mpi-cbg.de/labShevchenko/PeakStrainer/wikis/home)  
758 [cbg.de/labShevchenko/PeakStrainer/wikis/home](https://git.mpi-cbg.de/labShevchenko/PeakStrainer/wikis/home)) (Schuhmann et al., 2017). Lipids were  
759 identified by LipidXplorer software (Herzog et al., 2012). Molecular Fragmentation Query  
760 Language (MFQL) queries were compiled for PC, PC O-, LPC, LPC O-, PE, PE O-, LPE, PI,  
761 LPI, PA, LPA, PS, SM, TG, DG, Cer, Chol, CE lipid classes (see Table 1 for meaning of all  
762 abbreviations). The identification relied on accurately determined intact lipid masses (mass  
763 accuracy better than 5 ppm). Lipids were quantified by comparing the isotopically corrected  
764 abundances of their molecular ions with the abundances of internal standards of the same lipid  
765 class. The amount of lipids per animal was calculated based on the known volume of  
766 homogenization buffer and the known number of animals. Lipid amounts were normalized to cell  
767 number using the previously established scaling relationship between cell number and area  
768 (*Figure 2B*) and between length and area (*Figure 2 – figure supplement 1D*).

769

#### 770 Histological staining for glycogen on planarian cross sections

771 Fixation: two weeks-starved small (~ 4mm) and large (13mm -16mm) animals were anesthetized  
772 and relaxed for 5 min on ice by supplementing chilled planarian water with 0.0485% w/v  
773 Linalool (Sigma, L2602). Planarians were fixed in cold alcoholic Bouins fixative (15ml Picric  
774 acid (saturated alcoholic solution, TCS Biosciences, Cat. No.: HS660), 12 ml 32 % PFA, 2 ml  
775 glacial Acetic acid and 15 ml Ethanol) for overnight at 4°C and washed with 70 % Ethanol for  
776 following two days.

777 Paraffin embedding and sectioning: Fixed animals were dehydrated by alcohol-xylene series (1x  
778 10 min in 70 % ethanol and 2x for 30 min in 96 %, 100 % ethanol and xylene, respectively).  
779 Xylene was replaced by melted paraffin at 60 °C, which was exchanged three times, after 30 min,  
780 after several hours overnight and again after 30 min, which was followed by embedding. Cross-  
781 sections of 10 µm thickness were obtained using a microtome (Thermofisher Scientific, Microm  
782 HM355S). The sections were dewaxed and hydrated by xylene-ethanol series (2x 10 min Xylene,  
783 2x 1min 100 %, 96 % and 1x1 min 70 %, 40 %, ethanol and water). Prior to staining, one of two  
784 adjacent sections was treated (for 2 h, at 37 °C) with 0.2 N acetate buffer (pH 4.8) containing  
785 amyloglucosidase (0.03 U/µl) (Sigma A1602), while the other section with buffer only. By  
786 rinsing the sections with water, the digested glycogen was washed out on the section treated with  
787 amyloglucosidase but not on the section without enzyme treatment.

788 For glycogen visualization, we used Best's Carmine staining method. The Carmine stock and -  
789 working solutions (Carmine (C.I. 75470) Carl Roth, 6859.1) as well the differentiating solution  
790 were prepared as described in Romeis - Mikroskopische Technik (Mulisch & Welsch, 2010).  
791 The sections were treated for 10 min with Carmine working solutions following by  
792 differentiating solution 2x for 1 min. Sections were briefly rinsed with 80 % ethanol and treated  
793 2x for 1 min with 100 % Ethanol and 2x for 2 min with Xylene and mounted in Cytoseal™XYL  
794 (Richard-Allan Scientific; 8312-4). Stained sections were imaged with an Olympus BX61  
795 Upright Microscope with 5x and 20x objectives.

796

#### 797 Glycogen assay

798 Two weeks-starved animals were homogenized in water (40 worms of 4 mm length in 0.5 ml, 20  
799 worms of 8 mm in 1ml and 10 worms of 16 mm in 1ml) using zirconia/silica beads (1.0 mm

800 diameter, Carl Roth GmbH+Co.KG, Cat.No:11079110z) at 4°C for 10 min. After brief  
801 centrifugation, the samples were flash frozen in liquid nitrogen and sonicated (Covaris S2  
802 Sonicator) for 1 min. The homogenate was used for glycogen and total carbohydrate  
803 quantifications. The glycogen quantification method was adapted to planarians based on a  
804 protocol for *Drosophila* larvae from the C. Thummel lab (University of Utah). Heat-treated  
805 homogenate (70°C, 10 min) was centrifuged at 13400 rpm for 2 min and the supernatant was  
806 taken for the measurements. The extracted glycogen was digested to glucose by  
807 amyloglucosidase treatment (Sigma, Cat. No.: A1602) (0.015 U/μl of 0.2 M acetate buffer, pH  
808 4.8) for 2 h at 37 °C. The glucose content was measured using the glucose assay kit (Sigma, Cat.  
809 No.: GAGO-20). The assay was performed in black 96-well glass bottom plates (Greiner Bio-  
810 One, Cat. No.: 655090) and the absorption spectra was measured using Envision Microplate  
811 Reader (Perkin Elmer). Additionally, to assess background levels of free glucose, the supernatant  
812 without amyloglucosidase treatment was measured. Planarians do not contain free Glucose at  
813 detectable levels (data not shown). Glucose and Glycogen amounts were determined using a  
814 standard curve built on a glucose and glycogen dilution series, respectively. Glycogen extraction  
815 using hot 30 % KOH (*Figure 4 – figure supplement 1D*) was performed as previously published  
816 (Rasouli, Shokri-Afra, & Ostovar-Ravari, 2015).

817

#### 818 Total carbohydrate measurement

819 Determination of total carbohydrate was carried out on whole homogenates (same as used in  
820 glycogen assay) using the phenol-sulfuric acid method. In brief, the homogenate was heated with  
821 the 96% H<sub>2</sub>SO<sub>4</sub> at 90°C for 15 min, mixed with phenol (saturated with 0.1M citrate buffer, pH  
822 4.3, Sigma, Cat. No.: P4682) (Homogenate: H<sub>2</sub>SO<sub>4</sub>: phenol at a ratio of 1:5:5) and distributed

823 into a 96-well plate (Thermo Scientific Nunc, Cat. No: 167008). The absorbance was measured  
824 at 492 nm Envision Microplate Reader (Perkin Elmer). Carbohydrate amounts were determined  
825 using the glycogen standard curve (see previous section). The amount of glycogen and total  
826 carbohydrates per animal was calculated based on the known volume of homogenisation buffer  
827 and the known number of animals. Glycogen and carbohydrate amounts were normalised to  
828 organismal cell number using the previously established scaling relationship between cell  
829 number and area (*Figure 2B*) and between length and area (*Figure 2 – figure supplements 1D*).  
830 The non-glycogen carbohydrate amount was calculated by subtracting the determined glycogen  
831 from the carbohydrate amount.

832

### 833 Protein measurements

834 Planarians of approximately 4, 8 and 16 mm length were chosen and protein amounts were  
835 determined using the Pierce 660nm Protein Assay Reagent (ThermoFisher Scientific, Cat. No.:  
836 22660) according to the manufacturer's instructions. To ensure compatibility with the used lysis  
837 solution (see below), the Pierce 660nm Protein Assay Reagent was complemented with Ionic  
838 Detergent Compatibility Reagent (ThermoFisher Scientific, Cat. No.: 22663). Planarian lysates  
839 were prepared as follows: 44 small (length 4 mm), 10 medium (8 mm) and large (16 mm)  
840 animals were placed inside 1.5 ml tubes and rinsed once with dH<sub>2</sub>O. A lysis solution containing  
841 10 M Urea, 2 % sodium dodecyl sulfate (SDS), 130 mM dithiothreitol (DTT), 2.5 µg/ml  
842 Benzonase (home-made) and a protease inhibitor cocktail was added and the animals incubated  
843 for 10 min followed by homogenisation using a motorized plastic pestle. Volumes of lysis buffer  
844 used were 235 µl for small, 335 µl for medium and 2 ml for large animals. Subsequently, lysates  
845 were cleared by centrifugation at 13000 rpm for 1 minute. The assay was performed in black 96-

846 well glass bottom plates (Greiner Bio-One, Cat. No.: 655090) and the resulting absorption  
847 spectra measured using a FLUOstar Omega Microplate Reader (BMG LABTECH).

848

#### 849 Whole mount *in situ* hybridization

850 Whole mount *in situ* hybridization (WISH) was essentially performed as previously described  
851 (King & Newmark, 2013; Pearson et al., 2009).

852

#### 853 Statistics

854 All statistical analyses were carried out using GraphPad Prism version 7.0c for Mac OSX  
855 (GraphPad Software, La Jolla, California, USA).

856

#### 857 Software

858 Excel for Mac (Microsoft, Redmond, Washington, USA) and KNIME(Berthold et al., 2007)  
859 (KNIME AG, Zurich, Switzerland) were used for data handling and calculations; GraphPad  
860 Prism v7.0c (GraphPad Software, La Jolla, USA) was used for statistical analyses and data  
861 visualization; MATLAB (MathWorks, Natick, Massachusetts, USA) was used for planarian  
862 body size measurements, theoretical analysis of models, data handling and visualisation;  
863 CellProfiler (Carpenter et al., 2006) was used for image analysis; Fiji (Schindelin et al., 2012)  
864 was used for Western blot quantification and image processing; Adobe Photoshop CS5 and  
865 Illustrator CS5 (Adobe Systems, San Jose, California, USA) were used for image processing and  
866 generating figures; the manuscript was prepared for submission using Word for Mac (Microsoft,  
867 Redmond, Washington, USA).

868

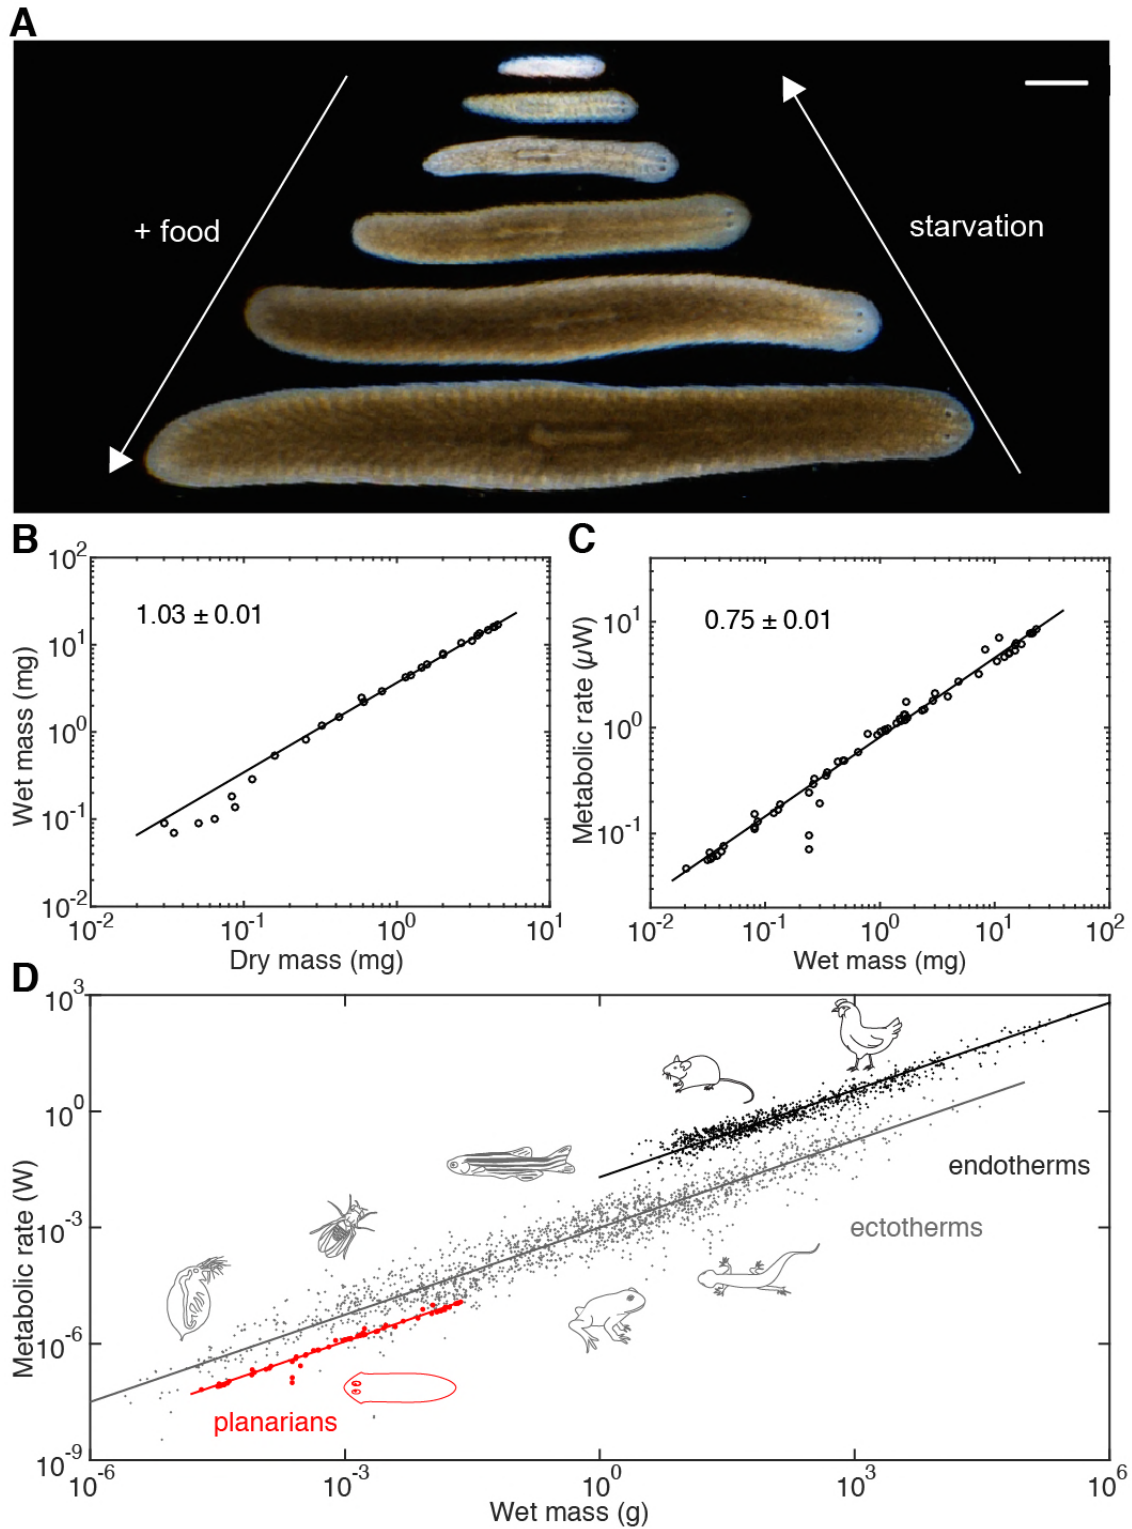



871 (A) Feeding (growth) and starvation (degrowth) dependent body size changes of *Schmidtea*  
872 *mediterranea*. Scale bar, 1 mm. (B) Wet versus dry mass scaling with body size. The scaling  
873 exponent  $\pm$  standard error was derived from a linear fit for wet mass  $> 0.5$  mg and represents the  
874 exponent  $b$  of the power law  $y = ax^b$ . See *Figure 1 – source data 1* for numerical data. (C)  
875 Metabolic rate versus wet mass scaling by microcalorimetry. The metabolic rate was determined  
876 by a horizontal line fitted to the stabilised post-equilibration heat flow trace (*Figure 1 – figure*  
877 *supplement 1*) and the post-experimental dry mass determination of all animals in the vial was  
878 re-converted into wet mass by the scaling relation from (B). Each data point represents a vial  
879 average of a size-matched cohort. The scaling exponent  $\pm$  standard error was derived from linear  
880 fits and represents the exponent  $b$  of the power law  $y = ax^b$ . (D) Metabolic rate versus wet mass  
881 scaling in planarians from (C) (green) in comparison with published interspecies comparisons  
882 (Makarieva et al., 2008) amongst ectotherms (grey) or endotherms (black). Dots correspond to  
883 individual measurements; black and blue solid lines trace the  $\frac{3}{4}$  scaling exponent; red line, linear  
884 fit to the planarian data. By convention (Makarieva et al., 2008), measurements from  
885 homeotherms obtained at different temperatures were converted to 37 °C, measurements from  
886 poikilotherms and our planarian measurements to 25 °, using the following factor:  $2^{\frac{25^{\circ}\text{C}-20^{\circ}\text{C}}{10^{\circ}\text{C}}} =$   
887  $2^{0.5}$  (20 °C: planarian data acquisition temperature).

888

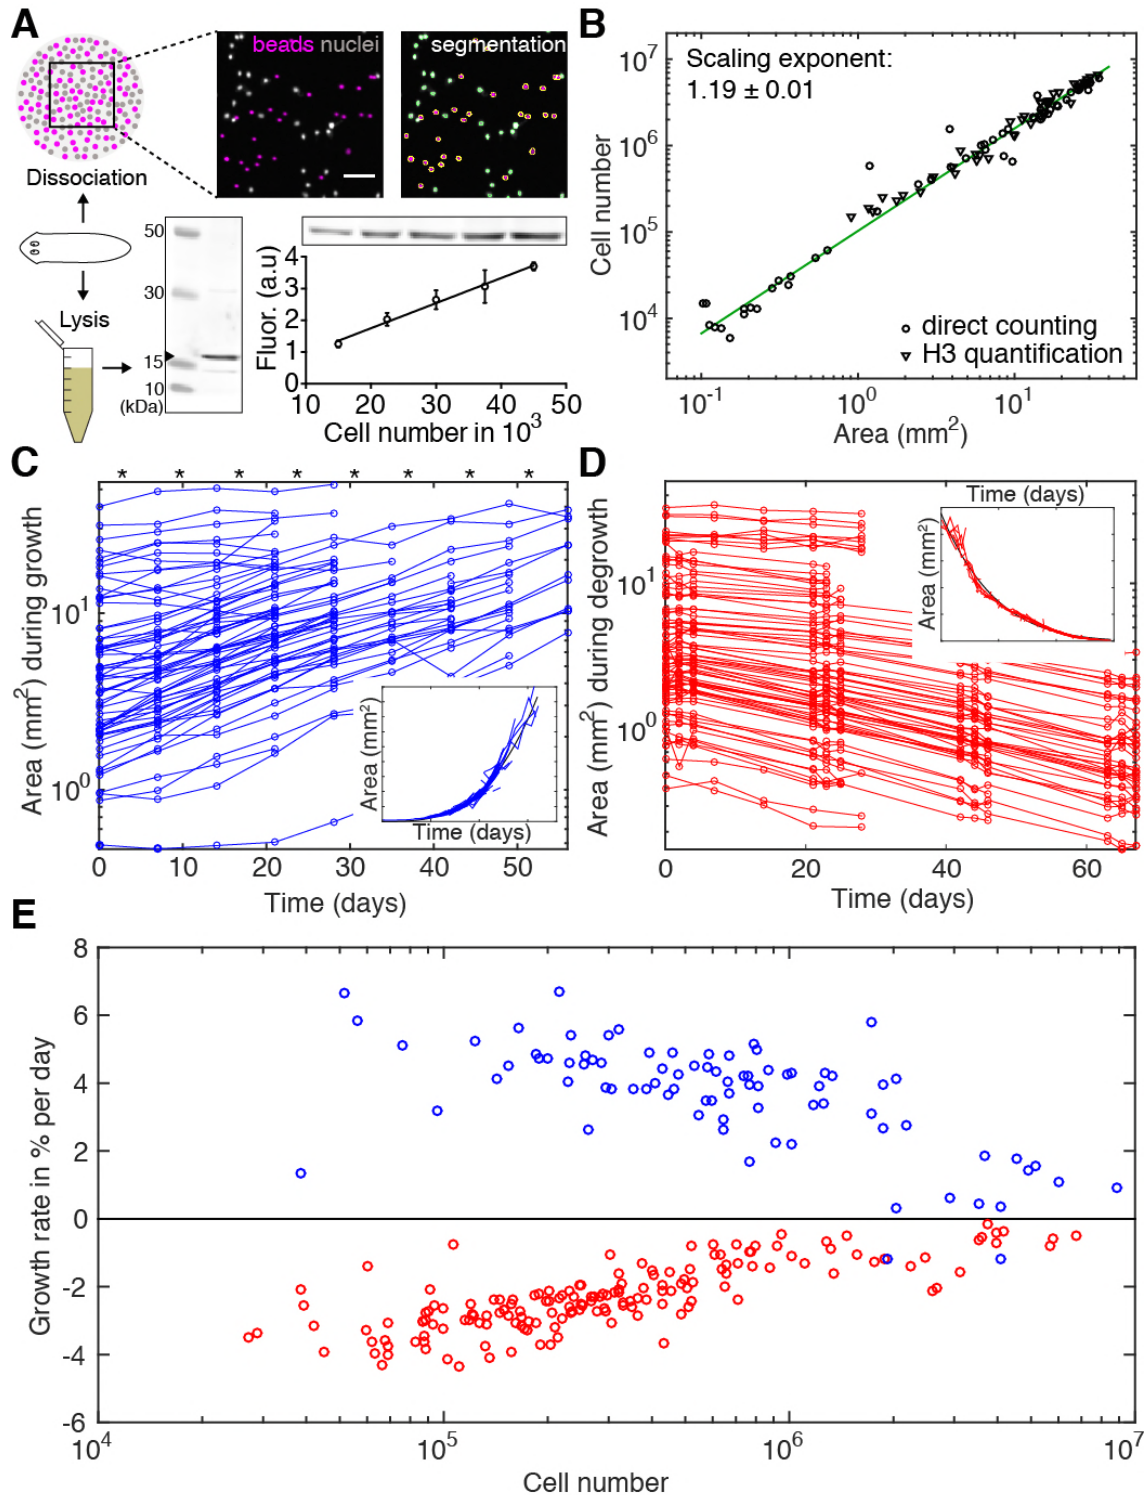

889

890 **Figure 2. Growth and degrowth dynamics in *S. mediterranea*.**

891 (A) Assays to measure organismal cell numbers. (Top) image-based quantification of nuclei

892 (grey) versus tracer beads (magenta) following whole animal dissociation in presence of the

893 volume tracer beads. Bottom, Histone H3 protein quantification by quantitative Western blotting,  
894 which scales linearly with the number of FACS-sorted cells (bottom right). The line represents a  
895 fitted linear regression (data of 4 technical replicates) and serves as standard for calibrating the  
896 H3 band in planarian lysates (bottom left) run on the same gel into cell numbers. Values are  
897 shown as mean  $\pm$  standard deviation. **(B)** Organismal cell number versus plan area scaling, by  
898 nuclei counts (circles) or Histone H3 protein amounts (triangles) (see also *Figure 2 – supplement*  
899 *1 and 2*). The scaling exponent  $\pm$  standard error was derived from a linear fit and represents the  
900 exponent  $b$  of the power law  $y = ax^b$ . Each data point represents one individual animal and the  
901 mean of several technical replicates, Histone H3 method: 9 independent experiments including 5  
902 animals each; image-based approach: 4 independent experiments including 18, 10, 10 and 12  
903 animals each. See *Figure 2 – source data 1-4* for numerical data. **(C)** Plan area changes of  
904 individual animals during growth. \* indicate feeding time points (1x per week). Inset,  
905 concatenation of individual growth traces by area overlap. **(D)** Plan area change of individual  
906 animals during degrowth. Inset, concatenation of individual degrowth traces by area overlap. **(E)**  
907 Size-dependence of growth (blue) and degrowth rates (red) (see also *Figure 2 – figure*  
908 *supplement 3*). Individual data points were calculated by exponential fits to traces in (C) and (D)  
909 (growth: 2 overlapping time windows, degrowth: 3 overlapping time windows) and using the cell  
910 number/area scaling law from (B) to express rates as % change in cell number/day. The positive  
911 growth rates and negative degrowth rates are plotted on the same axis to facilitate comparison of  
912 size dependence. See *Figure 2 – source data 4* for data of (C) and (D).

913

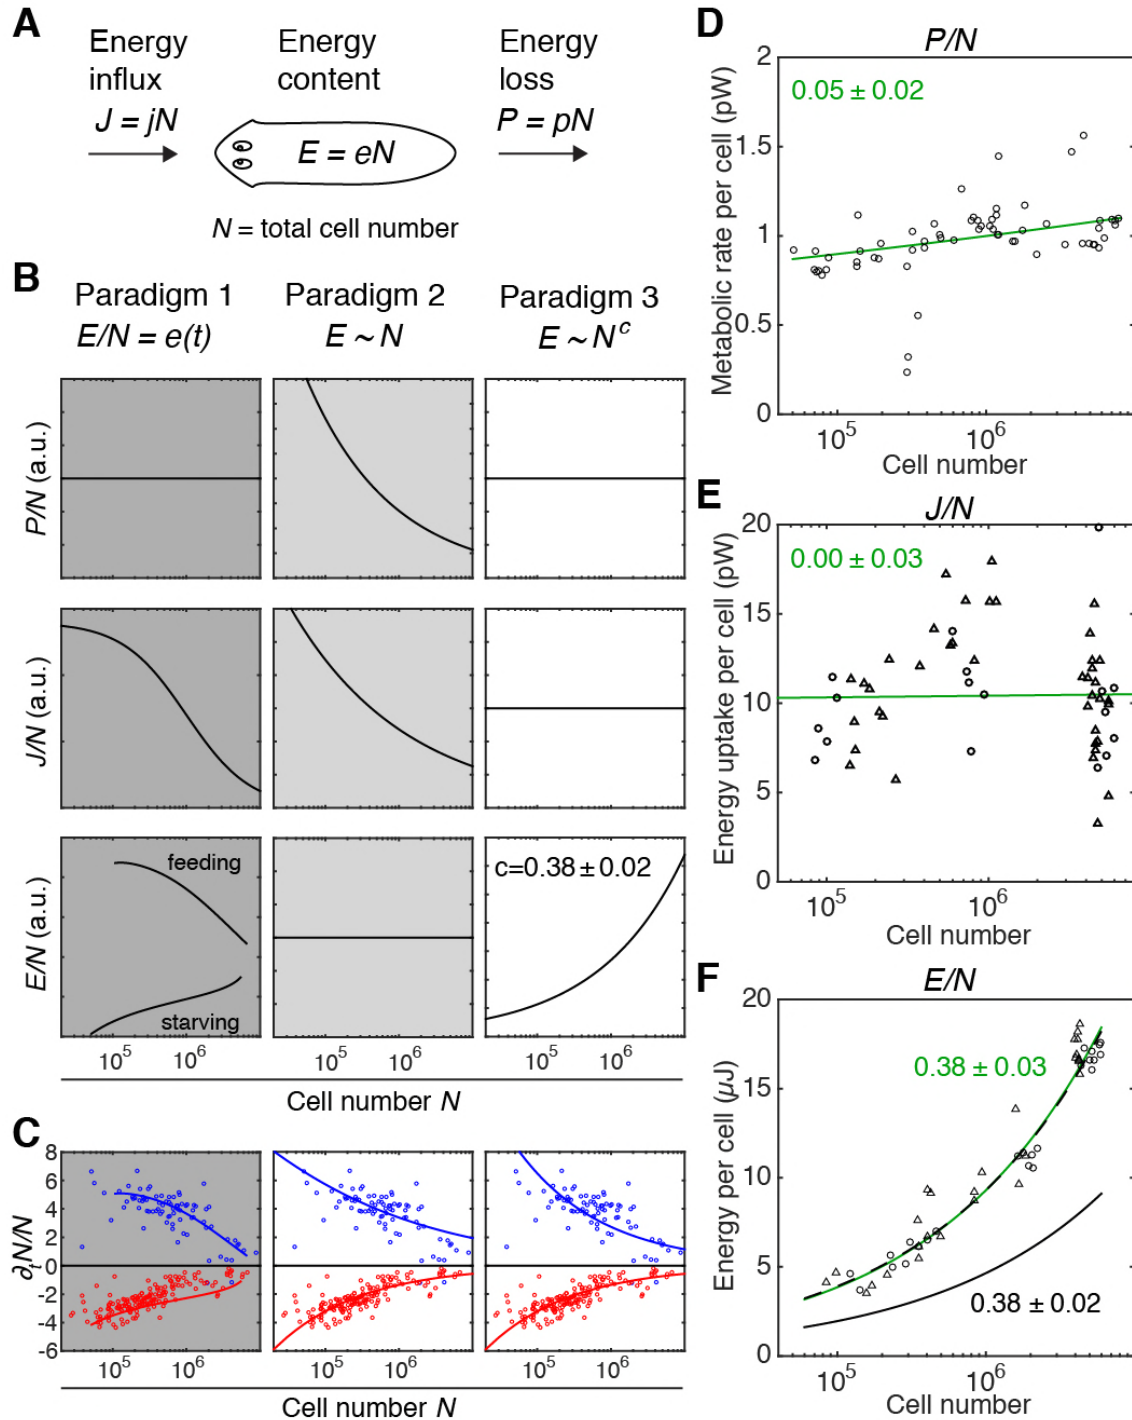

914

915 **Figure 3. Size-dependent scaling of energy content explains growth/degrowth dynamics.**

916 (A) Planarian energy balance model. At the organismal level, changes in the physiological

917 energy content  $E$  result from a change in the net energy influx  $J$  (feeding) and/or heat loss  $P$

918 (metabolic rate). Dividing  $E$ ,  $J$  and  $P$  by the total cell number  $N$  approximates the energy balance

919 on a per-cell basis. **(B)** Three hypothetical control paradigms of  $E$  during growth and degrowth  
920 (columns), which make specific predictions regarding the size-dependence of  $J/N$ ,  $E/N$  and  $P/N$   
921 (rows). Prediction traces and scale exponents were generated by modelling the measured  
922 growth/degrowth rates (*Figure 2E*) with the indicated control paradigm assumptions (see also  
923 *Figure 3 – figure supplement 1-3*). **(C)** Fit of the three control paradigms to the measured  
924 growth/degrowth rates (Fig. 2E). **(D)** Metabolic rate per cell ( $P/N$ ) versus organismal cell  
925 number ( $N$ ). Data points were derived by conversion of the measurements from the metabolic  
926 rate/dry mass scaling law (*Figure 1 – figure supplement 1B*) via the measured cell number/plan  
927 area (*Figure 2B*) and plan area/dry mass conversion laws (*Figure 3 – figure supplement 3A*). The  
928 scaling exponent  $\pm$  standard error was derived from the respective linear fits (green line) and  
929 represents the exponent  $b$  of the power law  $y = ax^b$ . **(E)** Energy uptake per cell versus organismal  
930 cell number ( $N$ ). Data points reflect single-animal quantifications of ingested liver volume per  
931 plan area as shown in *Figure 3 – figure supplement 3D*, converted into energy intake/cell using  
932 the plan area/cell number scaling law (Fig. 2B) and the assumption that 1  $\mu\text{l}$  of liver paste  
933 correspond to 6.15 J (“Nutrient report of calf liver,” 2016; Overmoyer, McLaren, & Brittenham,  
934 1987). Circles, 2 weeks-starved and triangles, 3 weeks-starved animals. The scaling exponent  $\pm$   
935 standard error was derived from linear fits (green line) and represents the exponent  $b$  of the  
936 power law  $y = ax^b$ . **(F)** Energy content per cell ( $E/N$ ) versus organismal cell number ( $N$ ). Data  
937 points reflect bomb calorimetry quantifications of heat release upon complete combustion of size  
938 matched cohorts of known dry mass as shown in *Figure 3 – figure supplement 3E*, converted via  
939 the measured cell number/plan area (Figure 2B) and plan area/dry mass conversion laws (*Figure*  
940 *3 – figure supplement 3A*). Circles, 1 week-starved and triangles, 3 weeks-starved animals. The  
941 scaling exponent  $\pm$  standard error was derived from linear fits (green line) to the data and

942 represents the exponent  $b$  of the power law  $y = ax^b$ . Solid black line, prediction from model 3 for  
943 the physiological energy content per cell assuming a constant metabolic rate  $P/N = 1$  pW.  
944 Dashed line corresponds to respective prediction under the assumption that the physiological  
945 energy (solid black line) amounts to 50 % of combustible gross energy in the animal. See *Figure*  
946 *3 – source data 1* for numerical data of (C)-(F).  
947

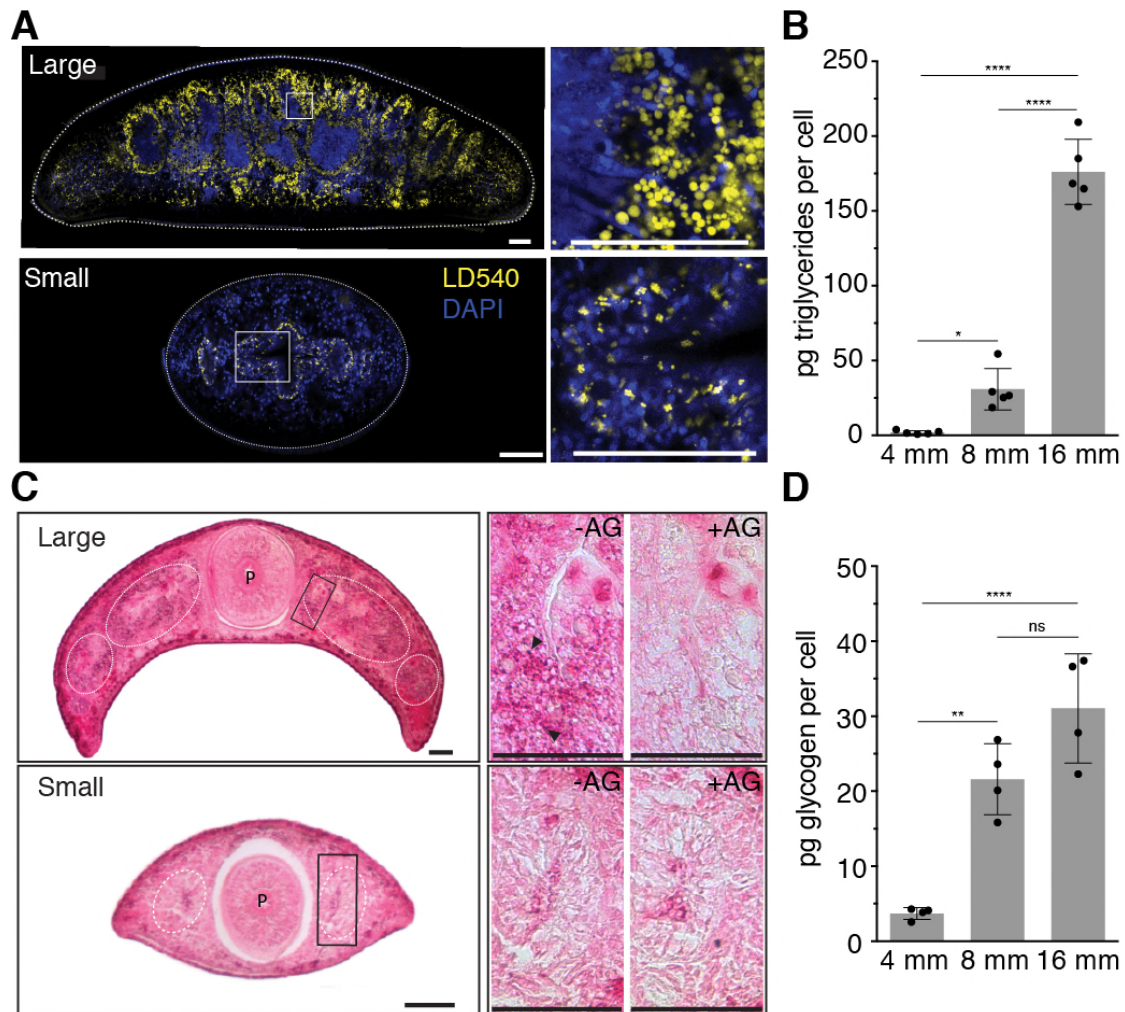

948

949 **Figure 4. Size-dependence of lipid and glycogen storage.**

950 (A) Lipid droplet (LD540, yellow) (Spandl et al., 2009) and nuclei (DAPI, blue) staining of pre-  
951 pharyngeal transverse cross sections of a large (16 mm length, top left) and a small (4 mm,  
952 bottom left). Right, magnified view of the boxed areas to the left. Scale bars, 100  $\mu$ m. See *Figure*  
953 *4 – source data 1* for raw images. (B) Mass-spectrometry-based quantification of triglycerides in  
954 animals of the indicated size (*Figure 4 – figure supplement 1A-B*). All values were normalised to  
955 organismal cell numbers using the previously established length versus area (*Figure 2 – figure*  
956 *supplement 1D*) and *N/A* (*Figure 2B*) scaling laws. Bars mark mean  $\pm$  standard deviation. n=5  
957 biological replicates consisting of 40 pooled 4 mm, 20 8 mm and 6 16 mm long animals analysed

958 in 2 technical replicates. Significance assessed by one-way ANOVA, followed by Tukey's post-  
959 hoc test ( $*p_{adj} \leq 0.05$ ,  $****p_{adj} \leq 0.0001$ ). See *Figure 4 – source data 2* for numerical data and  
960 statistics. (C) Histological glycogen staining (Best's Carmine method) of pre-pharyngeal  
961 transverse cross sections of a large (16 mm, top left) and a small (4 mm, bottom left). White  
962 circles: outline of intestine branches. P: Pharynx. Right, magnified view of the boxed areas to the  
963 left (black rectangles). +AG, pre-treatment with amyloglucosidase, which degrades glycogen; -  
964 AG, no pre-treatment of adjacent section. Arrow heads point to small, densely staining glycogen  
965 granules. Scale bars, 100  $\mu\text{m}$ . See *Figure 4 – source data 1* for raw images. (D) Quantification of  
966 organismal glycogen content using an enzyme-based colorimetric assay in animals of the  
967 indicated length (*Figure 4 – figure supplement C-F*). Bars mark mean  $\pm$  standard deviation.  $n=4$   
968 biological replicates (independent experiments), 40 pooled 4 mm, 20 8 mm, 8 16 mm analysed in  
969 3 technical replicates. Significance assessed by one-way ANOVA, followed by Tukey's post-hoc  
970 test (ns not significant,  $**p_{adj} \leq 0.01$ ,  $****p_{adj} \leq 0.0001$ ). See *Figure 4 – source data 2* for  
971 numerical data and statistics.



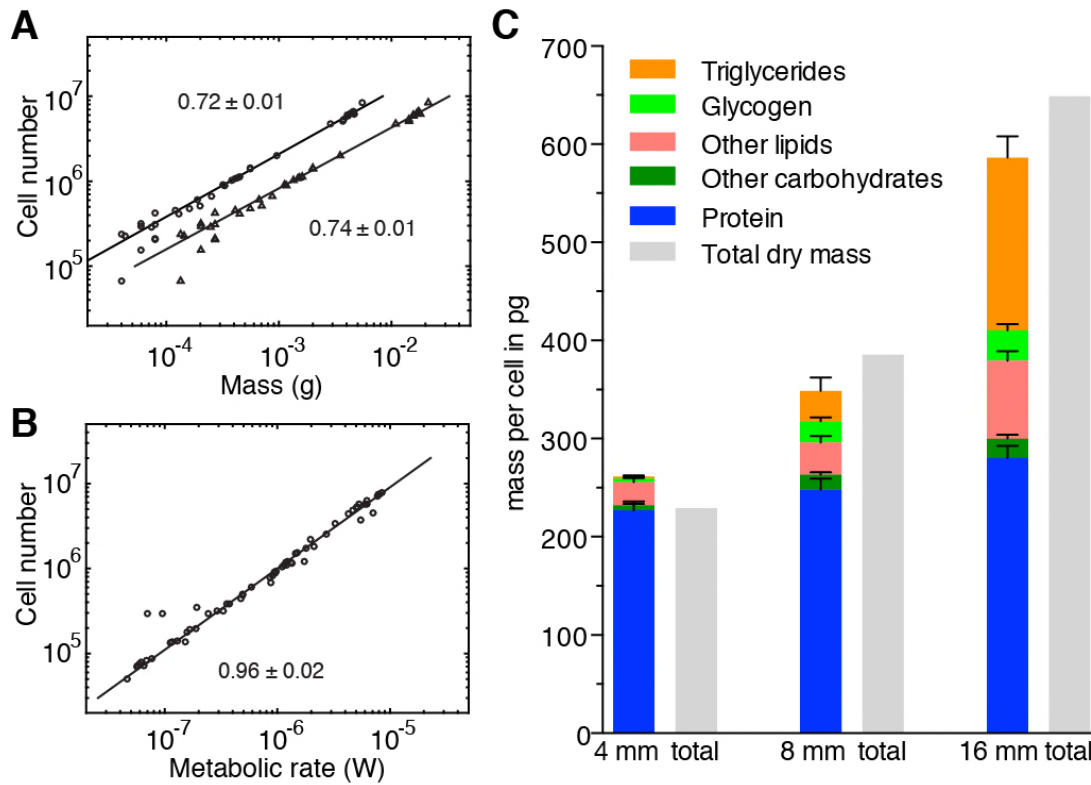

972

973 **Figure 5. Size-dependent energy storage explains Kleiber's law scaling.** (A) Cell number

974 versus dry mass (circles) or wet mass (triangles) based the data from *Figure 3 – figure*

975 *supplement 3A*. Cell numbers were converted from area using the  $N/A$  scaling law (*Figure 2B*).

976 Dry and wet mass conversion is given by *Figure 1B*. Scaling exponents  $\pm$  standard errors were

977 derived from respective linear fits and represent the exponent  $b$  of the power law  $y = ax^b$  (B) Cell

978 number versus metabolic rate, derived from *Figure 1B* with scaling laws of *Figure 2B* and

979 *Figure 3 – figure supplement 3A*. The scaling exponent  $\pm$  standard error was derived from

980 respective linear fits and represents the exponent  $b$  of the power law  $y = ax^b$ . (C) Mass

981 composition (coloured) and total dry mass (grey) per cell in animals of the indicated body length.

982 Triglyceride and glycogen measurements are taken from *Figure 4B* and *4D*. Quantification of

983 other (polar and non-polar) lipids is based on the mass-spectrometry data from *Figure 4B* ( $n=5$

984 biological replicates;  $p_{\text{adj}}=0.1720$  (no significance) 8 vs. 4 mm,  $p_{\text{adj}}<0.0001$  16 vs. 4 mm,

985  $p_{\text{adj}} < 0.0001$  16 vs. 8 mm; 2 technical replicates). Other carbohydrates represent total  
986 carbohydrate minus glycogen.  $n=4$  biological replicates (independent experiments), 40 pooled 4  
987 mm, 20 8 mm, 8 16 mm long animals;  $p_{\text{adj}}=0.0047$  8 vs. 4 mm,  $p_{\text{adj}}=0.0005$  16 vs. 4 mm,  
988  $p_{\text{adj}}=0.2790$  16 vs. 8 mm; 3 technical replicates. Protein content was measured colorimetrically.  
989  $n=4$  biological replicates (independent experiments), 44 pooled 4 mm, 10 8 mm, 10 16 mm long  
990 animals;  $p_{\text{adj}}=0.0020$  8 vs. 4 mm,  $p_{\text{adj}} < 0.0001$  16 vs. 4 mm,  $p_{\text{adj}}=0.0007$  16 vs. 8 mm) (see also  
991 *Figure 5 – figure supplement 1*). Significance was assessed by one-way ANOVA followed by  
992 Tukey’s post-hoc test. All values were normalised to the total cell number using the previously  
993 established length-area (*Figure 1 – figure supplement 1D*) and *N/A* (*Figure 2B*) scaling laws.  
994 Total dry mass was independently measured (*Figure 3 – figure supplement 3A*) and correlated  
995 with length using the length-area relationship (*Figure 1 – figure supplement 1D*). All values are  
996 shown as mean  $\pm$  standard deviation. See *Figure 5 – source data 1* for numerical data and  
997 statistics.  
998

999 **Figure supplements**

1000

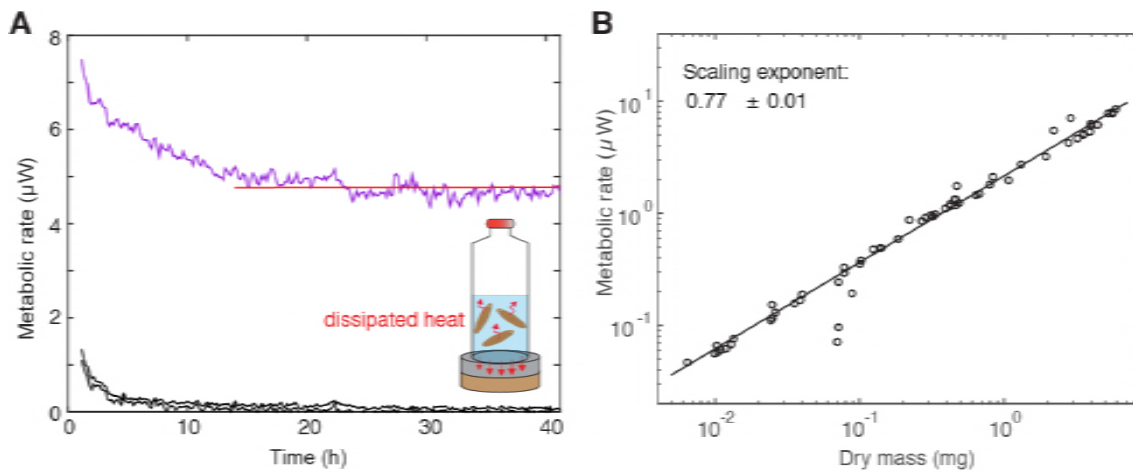

1001

1002 **Figure 1 – figure supplement 1. Measurement of metabolic rate.**

1003 (A) Cartoon of a vial with enclosed animals placed on a thermo-electric detector and  
1004 representative metabolic rate (heat flow) trace with an initial equilibration followed by a stable  
1005 phase. The thermo-electric detector measures the heat production relative to an oil bath kept at  
1006 constant temperature. The average metabolic rate was determined by manually fitting a  
1007 horizontal line (red). The first 10 h were always excluded because of the initial relaxation of the  
1008 control signal (medium only) which is shown in black. For individual samples, the relaxation  
1009 time has been estimated to be larger than 10 h. For 21 out of 83 samples, no fit could be obtained  
1010 due to high fluctuations of the signal. (B) Metabolic rate versus dry mass scaling used to plot  
1011 *Figure 1C*. The scaling exponent  $\pm$  standard error was derived from a linear fit and represents the  
1012 exponent  $b$  of the power law  $y = ax^b$ . See *Figure 1 – figure supplement 1 – source data 1* for  
1013 numerical data.

1014

1015

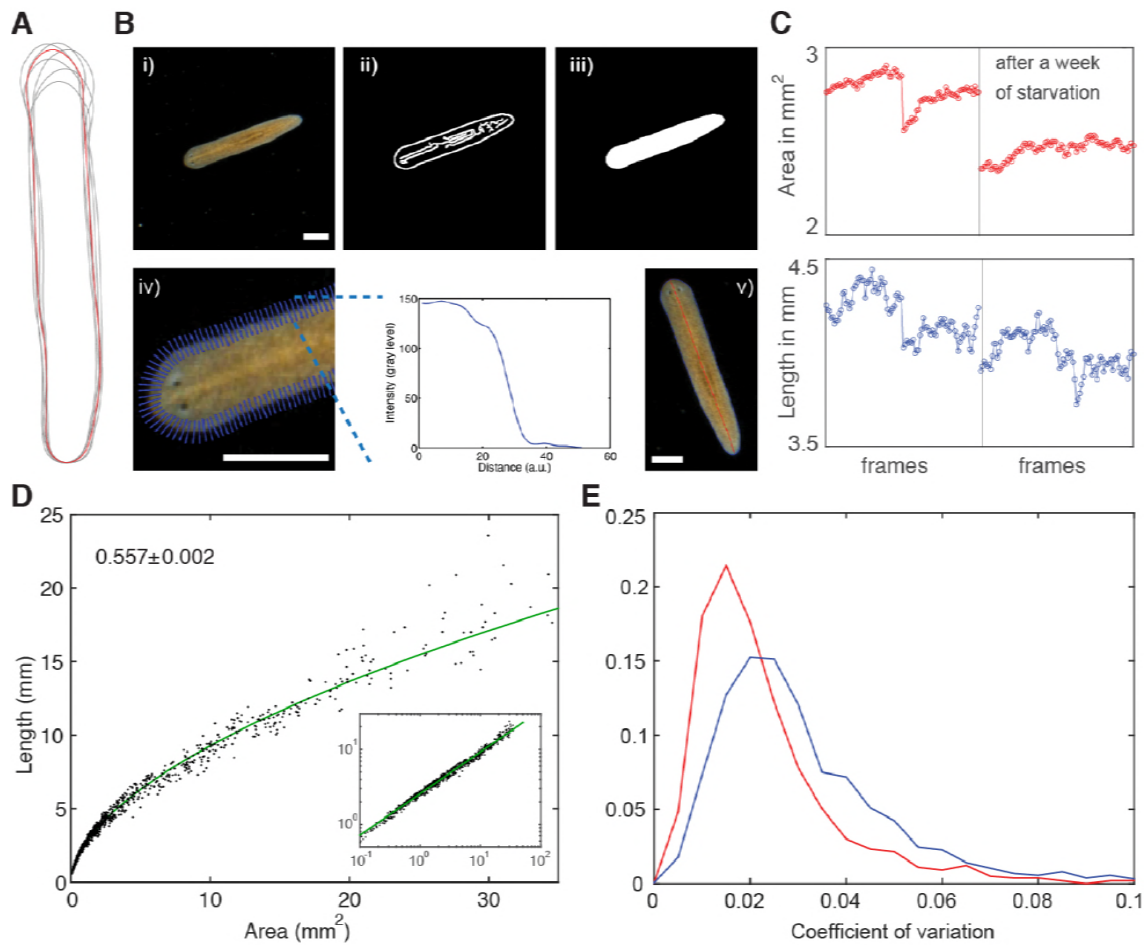

1016

1017 **Figure 2 – figure supplement 1. Measurement of planarian body size.**

1018 (A) Variable body outline of one individual extracted from a series of movie frames. (B) Pipeline  
 1019 for extracting plan area and length of planarians from movies, see also (Werner et al., 2014). i)  
 1020 raw movie frame, ii) use of Canny filter on background-corrected frames to identify edges, iii)  
 1021 dilation-erosion cycle to fill holes, iv) refinement of animal perimeter by finding steepest  
 1022 intensity across body edge, v) final boundary outline (blue) and midline (red) used to calculate  
 1023 area and length. Scale bars, 1 mm. See *Figure 2 – source data 4* for MATLAB script. (C) Area  
 1024 (top) and length traces (bottom) of the same individual separated by one week of starvation  
 1025 (compare left and right box). A drop of plan area and length reflects the expected decrease in  
 1026 body size and shows sensitivity, in particular of the less variable area, to small size changes. (D)

1027 Length versus area scaling including almost 900 measurements suggests tight regulation of body  
1028 shape during growth and degrowth and confirms the accuracy of our size quantification method.  
1029 The scaling exponent  $\pm$  standard error was derived from a linear fit and represents the exponent  $b$   
1030 of the power law  $y = ax^b$ . Inset shows the same data plotted on logarithmic axes. **(E)** Histogram  
1031 of the coefficients of variation (ratio standard deviation/mean) revealing less variability of the  
1032 plan area compared to body length. See *Figure 2 – figure supplement 1 – source data 1* for data  
1033 of (D) and (E).  
1034

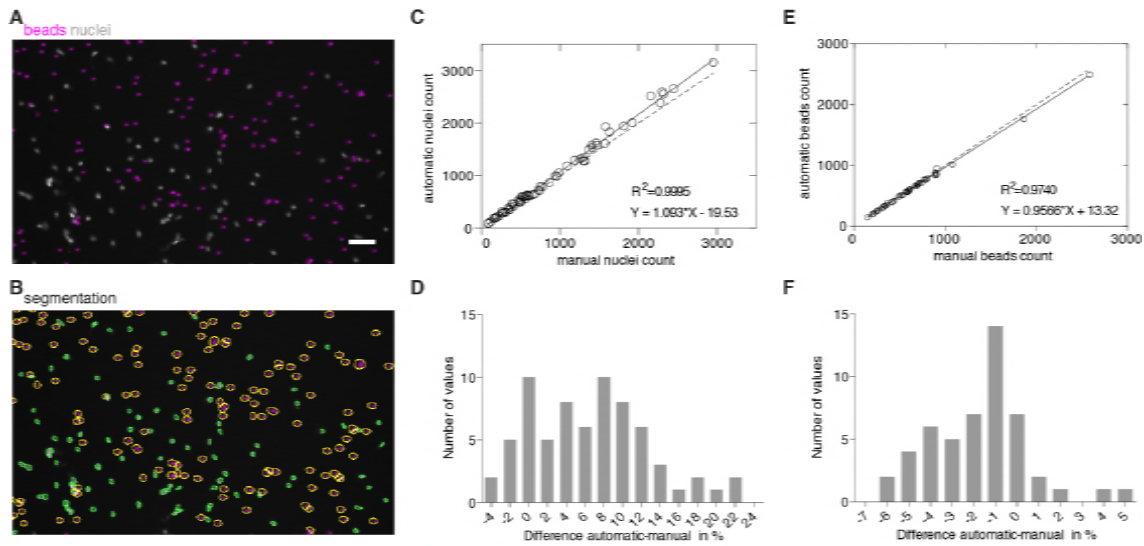

1035

1036 **Figure 2 – figure supplement 2. Validation of image-based quantification of organismal cell**  
1037 **number.**

1038 (A) Nuclei (grey) and fluorescent beads (magenta) inside a drop. (B) Automatic segmentation of  
1039 nuclei (green contours) and beads (yellow contours). Scale bar, 25  $\mu$ m. (C) The high correlation  
1040 between automatic and manual counting methods confirms accuracy of nuclear counts (analysis  
1041 of 69 images from 3 experiments). Solid line, linear regression; dotted line, hypothetical perfect  
1042 match between automatic and manual counts ( $y=x$ ). (D) Histogram showing the (binned) number  
1043 of measured differences per image between automatic and manual counting (E), The high  
1044 correlation between automatic and manual counting methods confirms accuracy of bead counts  
1045 (analysis of 50 images from 3 experiments). Solid line, linear regression; dotted line,  
1046 hypothetical perfect match between automatic and manual counts ( $y=x$ ). (F) Histogram showing  
1047 the number of (binned) measured differences per image between automatic and manual counting.  
1048 See *Figure 2 – figure supplement 2 – source data 2* for raw images and numerical data of (C)-  
1049 (F).

1050

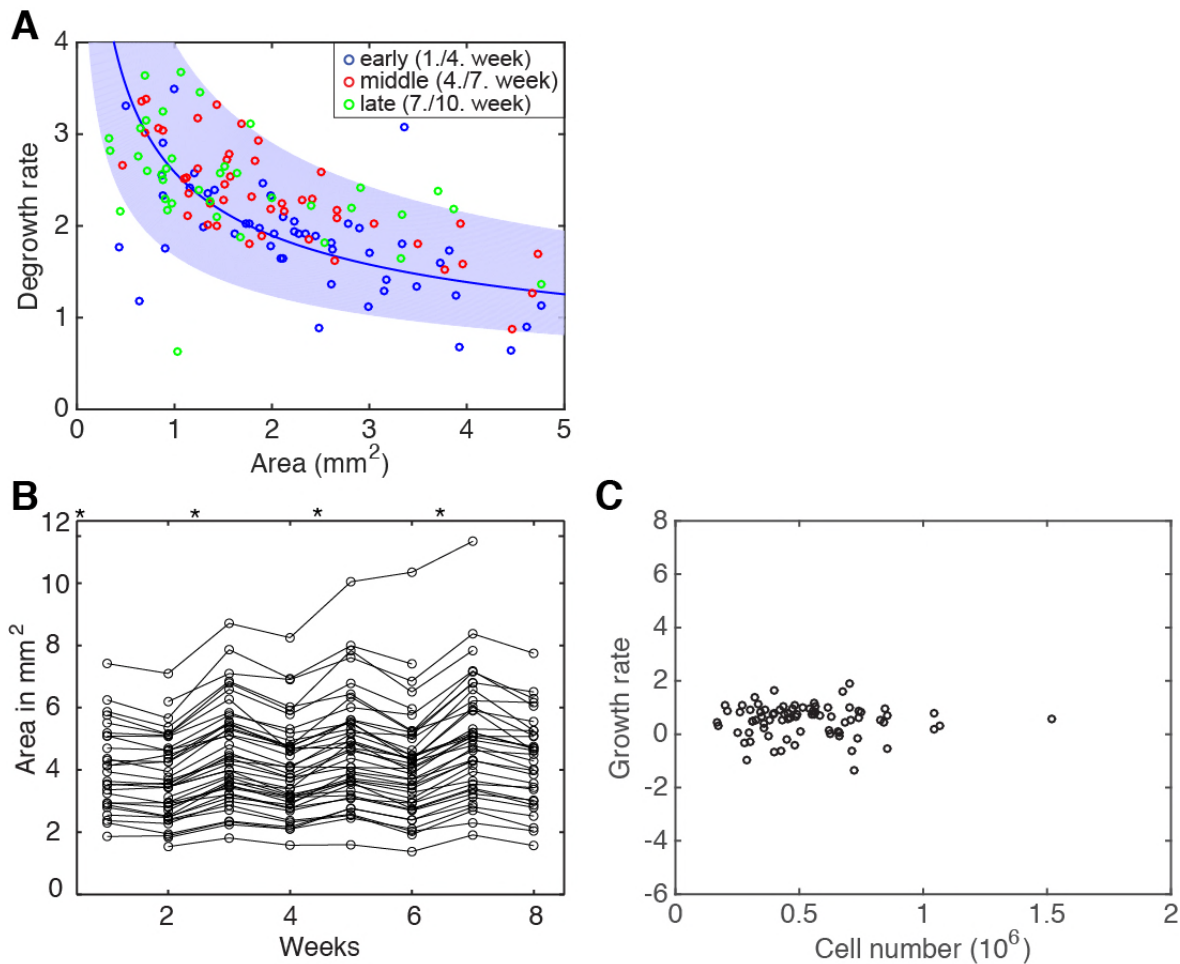

1051

1052 **Figure 2 – figure supplement 2. Degrowth rates are independent of feeding history.**

1053 (A) Degrowth rates from Fig. 2E colour-coded according to time since start of food deprivation;  
1054 early (blue), 1-4 weeks; middle (red), 4-7 weeks; late (green), 7-10 weeks. Solid line represents a  
1055 power law ( $y = ax^b$ ) fit to the early (blue) time points. Blue band represents the 95 % confidence  
1056 interval for the early (blue) degrowth rates; note that middle (red) and late (green) degrowth rates  
1057 lie mostly within this interval, hence, are not significantly different from the earliest points (no  
1058 feeding history). (B) Area change of individual animals fed every second week (\* indicate  
1059 feeding time points). Every feeding event results in a small growth peak. While feeding every  
1060 second week maintains on average a stable body size, an increased feeding frequency would  
1061 cause addition of small growth peaks resulting in long-term growth. See *Figure 2 – source data*

1062 5 for respective data. (C) Calculating de-/growth rates based on (B) reveals that feeding every  
1063 second week, on average, results neither in growth nor in degrowth. Individual data points were  
1064 calculated by exponential fits to traces in (B) across 2 time windows and using the *N/A* scaling  
1065 law (*Figure 2B*) to express rates as % change in cell number/day.

1066



1067 **Figure 3 – figure supplement 1 (text only). Implementation of the theoretical model**

1068 The model describes the dynamic changes of total physiological energy  $E$ , defined as the fraction  
1069 of energy in the body that can be metabolized and released as heat, see *Figure 3A*. The  
1070 physiological energy  $E$  thus decreases due to metabolic heat production  $P$  and increases due to  
1071 feeding, where  $J$  captures the net influx of physiological energy (taking into account a potentially  
1072 elevated metabolism during feeding):  $\dot{E} = J - P$ . The dot denotes the time derivative. The  
1073 average energy per cell is computed by dividing the total physiological energy by the total  
1074 number of cells  $N$ :  $e = E/N$ . Thus, the energy per cell changes according to:  $\dot{e} = j - p - Ke$ ,  
1075 where we define  $j = J/N$ ,  $p = P/N$  and the growth rate  $K = \dot{N}/N$ . An increasing cell number  
1076 decreases the energy per cell.

1077 Paradigm 1 assumes that cell division and cell death directly depend on the energy available per  
1078 cell  $e$ . For simplicity, we consider a linear relationship between the growth rate and the energy  
1079 per cell:  $K = K_0(e/e_s - 1)$ , with  $K_0$  being a characteristic rate of growth and degrowth and  
1080  $e_s$  being the critical energy per cell at which planarians switch between growth and degrowth  
1081 (*Figure 3 – figure supplement 2A*, dashed line). Thus, we can describe the energy dynamics by  
1082  $\dot{e} = j - p - K_0(e/e_s - 1)e$ . During starvation,  $j = 0$  and the growth rate is decreasing, which  
1083 requires  $\dot{e} < 0$  (red curve). The maximum of  $\dot{e}$  is at  $e = e_s/2$  and from  $\dot{e} < 0$  follows that  $p >$   
1084  $e_s K_0/4$ . During feeding, where  $j > p$  the curve is shifted upwards and  $e$  ends up in a growth  
1085 regime (blue curve). For a constant energy influx  $j$ , the equation for  $\dot{e}$  has a stable fixed point

1086 
$$e^* = \frac{e_s}{2} + \sqrt{\left(\frac{e_s}{2}\right)^2 + \frac{(j-p)e_s}{K_0}}$$
 with  $e^* > e_s$  for  $j > 0$ . Thus, the animal would grow at a constant

1087 rate  $K^* = K_0(e^*/e_s - 1)$ . In order for the growth rate to decrease with animal size (*Figure 2E*),

1088 the energy influx per cell  $j(N)$  must not be constant but has to be a decreasing function of  $N$ ,  
1089 hence, we choose  $j(N) = j_0/(1 + N)$ .

1090 *Figure 3 – figure supplement 2B* shows a time course of the organismal cell number  $N$  when  
1091 going through several rounds of feeding (blue) and starvation (red), always switching at a certain  
1092 size, specifically at  $N = 0.5 \cdot 10^6$  cells and  $N = 4.5 \cdot 10^6$  cells (lower and upper dashed lines,  
1093 respectively). In the beginning of the starvation interval, we see an overshoot where the animal  
1094 still grows although feeding has stopped. As a result, we observe rather generic growth and  
1095 degrowth kinetics, independent of initial values for energy and cell number or the feeding  
1096 scheme, see *Figure 3 – figure supplement 2C*. Any perturbation decays quickly and there is no  
1097 strong dependence on feeding history.

1098 Paradigm 2 and 3 assume a constant relationship between cell number and physiological energy  
1099 content of the worm:  $E \sim N$  and  $E \sim N^c$ , respectively. In consequence  $\dot{N}/N = \dot{E}/E$  and  $\dot{N}/N =$   
1100  $\dot{E}/(Ec)$ , respectively, which can be related to metabolic rate and feeding influx via  $\dot{E}/E =$   
1101  $-P/E$  during degrowth and via  $\dot{E}/E = (J - P)/E$  during growth. In paradigm 2,  $E/N$  is  
1102 constant, therefore both  $P/N$  and  $J/N$  have to depend on  $N$  to explain the growth and degrowth  
1103 rates. In paradigm 3, both  $P/N$  and  $J/N$  can be chosen to be constant.

1104 To fit the growth dynamics in *Figure 2C* by paradigm 1, we use the following parameters:  
1105  $j_0/e_s = 14\%/d$ ,  $p/e_s = 1.3\%/d$ ,  $K_0 = 4.3\%/d$ , initial conditions  $N(0) = 3 \cdot 10^6$  and  $e(0)/$   
1106  $e_s = 1$  as well as a switch between feeding and starvation regimes at  $N = 0.05 \cdot 10^6$  and  $N =$   
1107  $6.5 \cdot 10^6$ . Yet, several combinations of parameter values can fit the measurement equally well.  
1108 From a fit of paradigm 2 in *Figure 2C*, we obtain  $P/E = 243 N^{-1.35}\%/d$  and  $J/E =$   
1109  $214 N^{-0.28}\%/d$ . Finally, from a fit of paradigm 3 to the data, we obtain  $E/P = 0.34 N^{0.38}d$  and  
1110  $J/P = 3.0$ , see *Figure 2C*.

1111

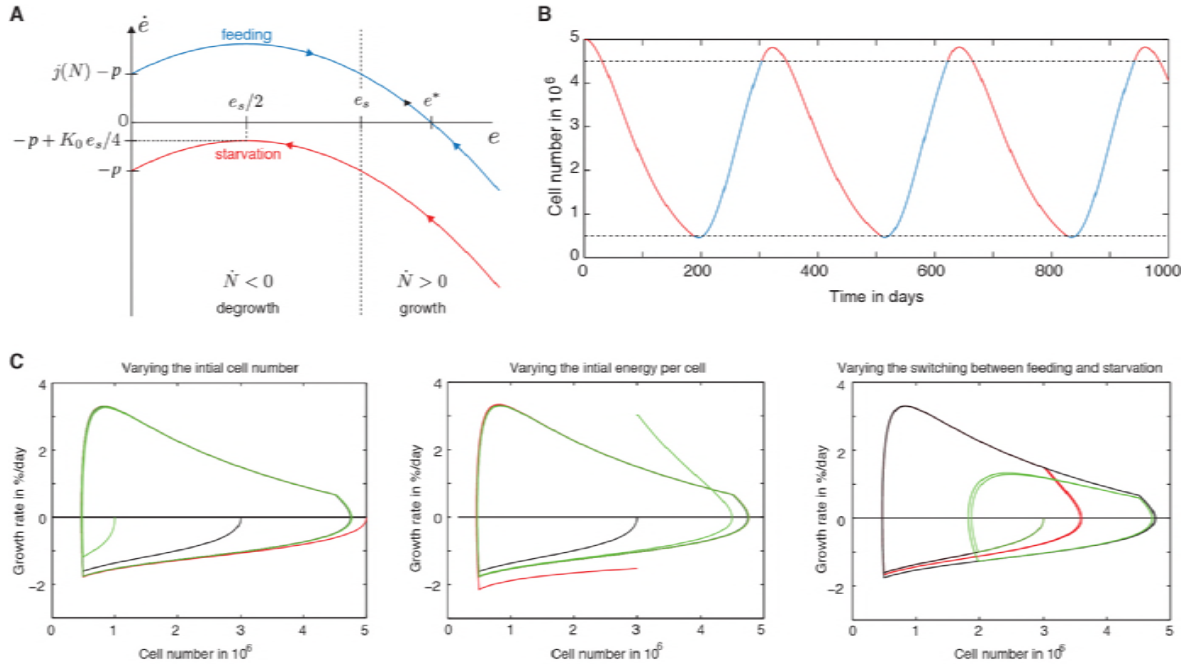

1112

1113 **Figure 3 – figure supplement 2. Further explanation of model paradigm 1.**

1114 (A) Dynamic behaviour of the energy content per cell during feeding and starvation in paradigm

1115 1. Graph shows the change of the energy content per cell  $\dot{e}$  as a function of the energy content  
1116 per cell  $e$  during starvation and feeding. See *Figure 3 – figure supplement 1* for a detailed

1117 description of paradigm 1. (B) Time course of the organismal cell number  $N$  when going through

1118 several rounds of feeding (blue) and starvation (red), always switching at a certain size,

1119 specifically at  $N = 0.5 \cdot 10^6$  cells and  $N = 4.5 \cdot 10^6$  cells (lower and upper dashed lines,

1120 respectively). In the beginning of the starvation interval, we see an overshoot where the animal

1121 still grows although feeding has stopped. (C) A generic growth/degrowth dynamic is observed

1122 irrespective of the initial cell number, initial energy content or the feeding scheme. Any

1123 perturbation decays quickly and there is no strong dependence on feeding history. See *Figure 3 –*

1124 *figure supplement 1* for details.

1125

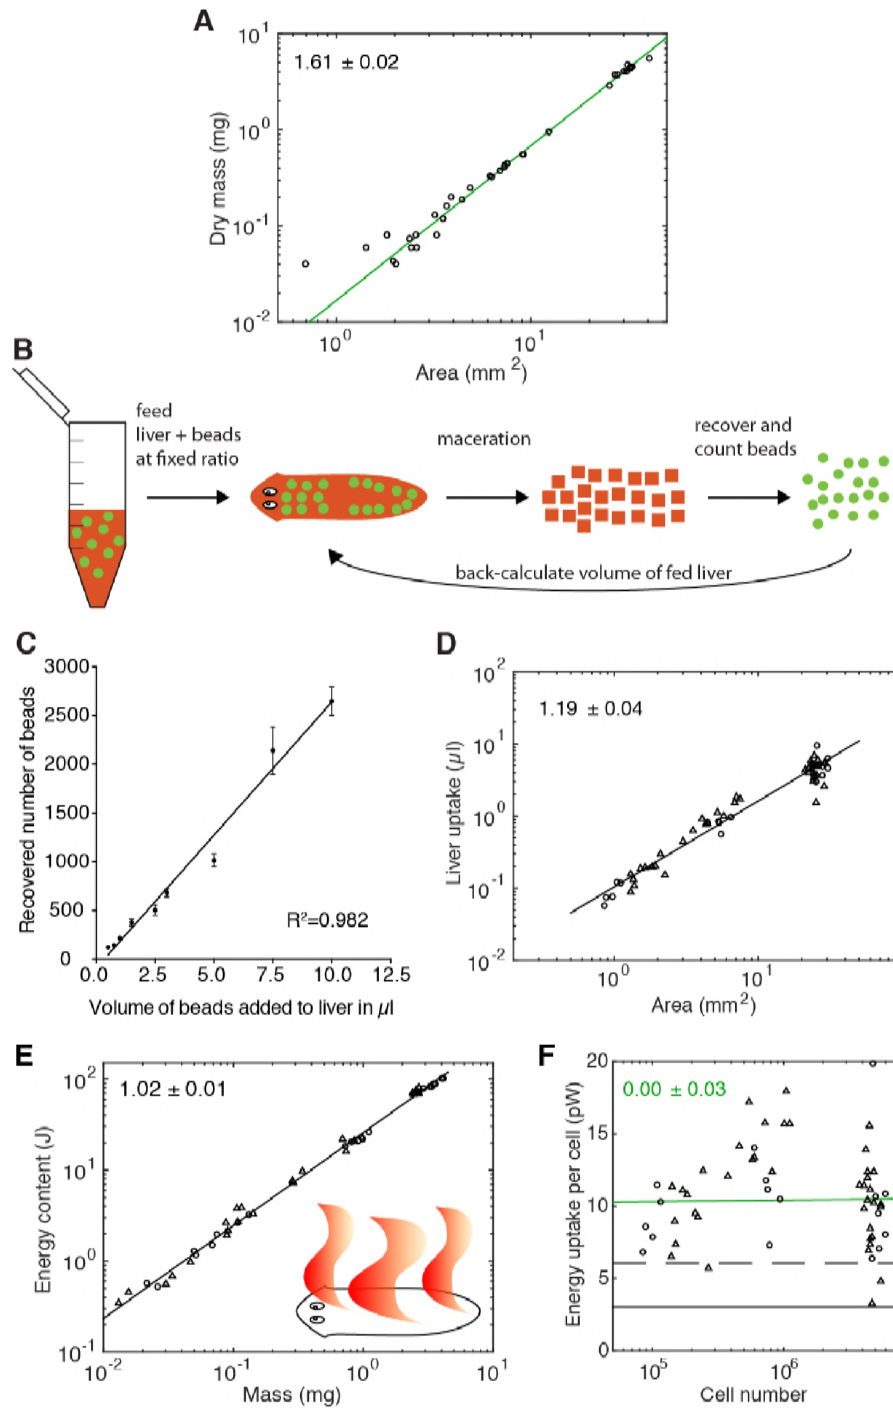

1126

1127 **Figure 3 – figure supplement 3. Paradigm validation.**

1128 (A) Dry mass versus plan area scaling used to convert dry mass into cell numbers (via  
1129 relationship in *Figure 2B*) (each data point = one individual animal, 2 independent experiments  
1130 represented with 21 and 15 animals, respectively). The scaling exponent  $\pm$  standard error was

1131 derived from a linear fit and represents the exponent  $b$  of the power law  $y = ax^b$ . **(B)** Cartoon of  
1132 food intake assay. A mixture of liver with a known concentration of spiked-in fluorescent beads  
1133 as volume tracers is fed to the animals. Afterwards, individual animals are macerated and the  
1134 number of recovered beads within a small volume fraction of the macerate are counted using a  
1135 similar image-based approach as shown in *Figure 2A* (top). Extrapolation to the initial total  
1136 sample volume reveals the total number of fed beads and finally, based on the known beads/liver  
1137 ratio, the total volume of fed liver. **(C)** Recovery of a linear beads dilution series ( $R^2 = 0.982$ ) fed  
1138 to the animals demonstrates the validity of using beads as a volume tracer. The line represents a  
1139 fitted linear regression to data from one experiment; error bars, standard deviation. **(D)** Volume  
1140 liver taken in as a function of plan area. Volume and area represent the original measurements  
1141 based on which we calculated energy intake using the known nutritional value of calf liver  
1142 (“Nutrient report of calf liver,” 2016) and the density of human adult liver (Overmoyer et al.,  
1143 1987) as well as organismal cell number using *Figure 2B*. Food intake is not dependent on  
1144 feeding history, compare 2 weeks- (circles) with 3 weeks-starved (triangles) animals. The scaling  
1145 exponent  $\pm$  standard error was derived from a linear fit and represents the exponent  $b$  of the  
1146 power law  $y = ax^b$ . **(E)** Energy content (gross calorific value) as a function of dry mass. The  
1147 energy content is not dependent on feeding history, compare 1 week- (circles) with 3 weeks-  
1148 starved (triangles) animals. The scaling exponent  $\pm$  standard error was derived from a linear fit  
1149 and represents the exponent  $b$  of the power law  $y = ax^b$ . See *Figure 3 – figure supplement 3 –*  
1150 *source data 1* for data of (A), (D) and (E). **(F)** Food uptake per cell versus organismal cell  
1151 number ( $N$ ) (same data as in *Figure 3E*). Green line, fit to the data representing ingested feed  
1152 energy. Scaling exponent  $\pm$  standard error derived from linear fits and representing the exponent  
1153  $b$  of the power law  $y = ax^b$ . The black solid line represents the physiological net energy uptake

1154 (~30 % of the ingested feed energy): i.e. the net amount of energy which is assimilated by the  
1155 animal body following digestion in the gut (minus energy loss due to a potential elevated  
1156 metabolism during feeding) and eventually fully metabolised, thus contributing to the measured  
1157 heat production (predicted from *Figure 3D*, assuming a constant metabolic rate per cell of 1  
1158 pW). The conversion between gross and physiological energy (see *Figure 3F*) allows to predict  
1159 the net ingested feed energy (dashed line) which is assimilated by the animal body (~60 % of  
1160 ingested feed energy). This corresponds to a feed conversion ratio (ratio between feed mass and  
1161 resulting gain in body mass, a measure for how efficient an organism converts feed into body  
1162 mass) of ~2.6, similar to other aquatic animals (Tacon & Metian, 2008), see also  
1163 discussion. Circles, 2 weeks-starved and triangles, 3 weeks-starved animals, indicate no obvious  
1164 dependence on feeding history up to 3 weeks after feeding.

1165

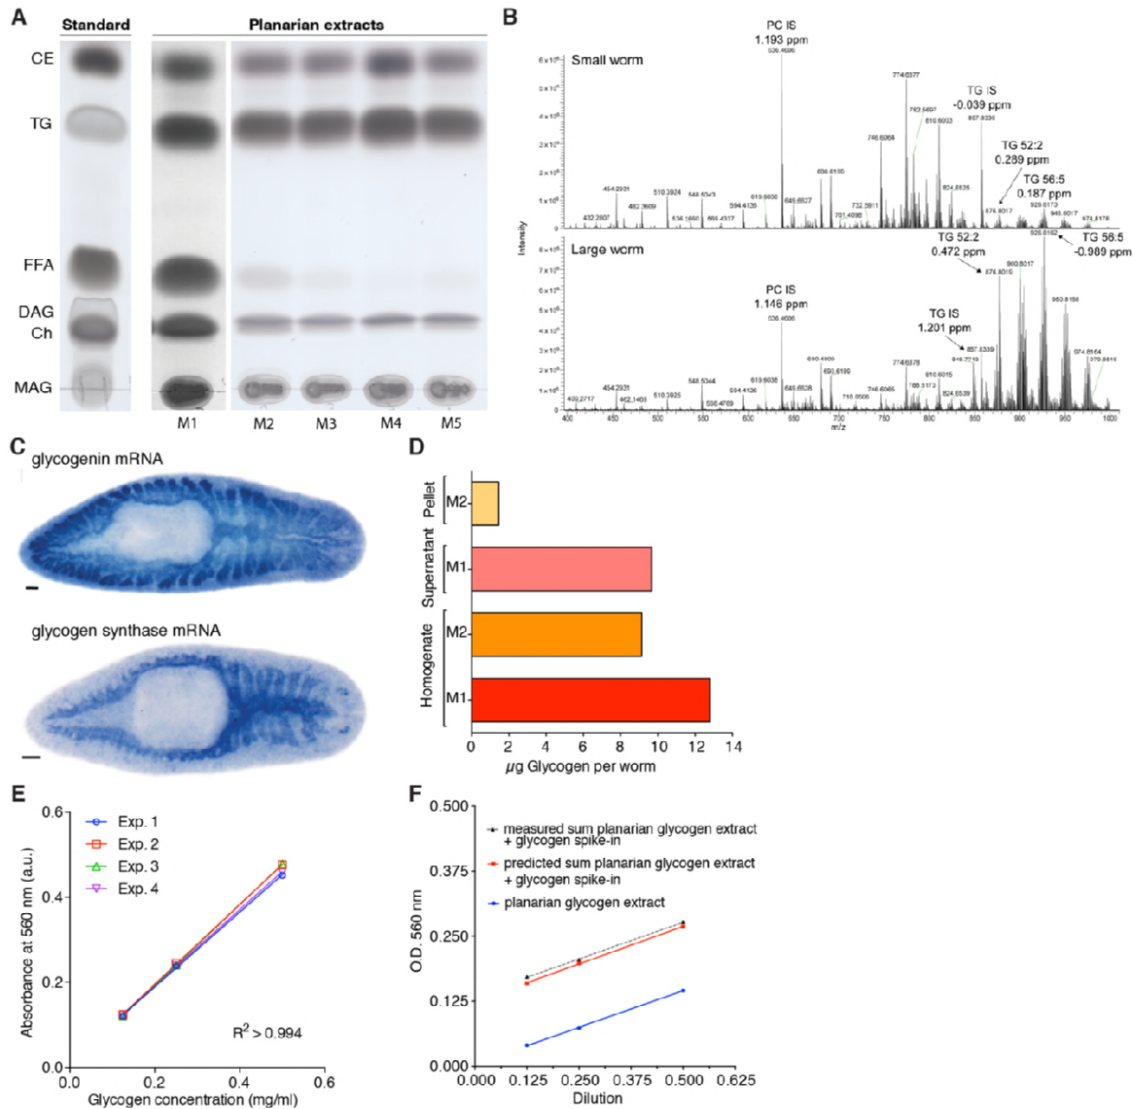

1166

1167 **Figure 4 – figure supplement 1. Alternative assays confirm lipid and glycogen storage in**  
 1168 **planarians.**

1169 (A) Right, TLC (thin layer chromatography) analysis of planarian lipid extracts with different  
 1170 homogenization conditions to prevent triglyceride (TG) degradation: M1, Bligh and Dyer  
 1171 method (Bligh & Dyer, 1959); M2, 300  $\mu\text{l}$  Isopropanol; M3, 1ml ice-cold Isopropanol; M4, ice-  
 1172 cold Isopropanol/Acetonitrile (1:1); M5, 1ml Isopropanol with 0.5% glacial acetic acid. The  
 1173 homogenization in ice-cold Isopropanol/Acetonitrile (1:1) generates the least amount of free  
 1174 fatty acids (FFAs), reflecting the least degradation rate of TGs. Left, TLC separation of the

1175 standards: CE, Cholesteryl linoleate; TG, Glycerol trioleate; FFA, Linoleic acid; DAG,  
1176 Dioleoylglycerol; Ch, Cholesterol; MAG, 1-Oleoyl-rac-glycerol. **(B)** Representative example of  
1177 mass spectrum of small and large animals from positive mode (i.e. positively charged analytes).  
1178 Highlighted are the internal standards for Phosphatidylcholine (PC IS) and Triglyceride (TG IS)  
1179 and two of planarian endogenous Triglycerides (TG 52:2 and TG 56:5). The peak intensity of TG  
1180 52:2 and TG 56:5 is almost 14-fold higher in large worms compared to small worms while the  
1181 intensity of PC IS and TG IS show only minor differences (~1.3-fold small vs. large). ppm, parts  
1182 per million mass accuracy. See *Figure 4 – source data 2* for quantification of relevant lipid  
1183 classes. **(C)** *in situ* hybridisation against glycogenin (left) and glycogen synthase mRNA (right)  
1184 further supports our finding that planarian store sugar in the form of glycogen (see also *Figure*  
1185 *4C-D*). Scale bars, 100  $\mu\text{m}$ . **(D)** Comparison of different glycogen extraction methods on total  
1186 homogenate, supernatant and pellet fractions. M1: Water extraction, M2: hot alkali extraction.  
1187 Water extraction and glycogen from the supernatant fraction were used in this study. **(E)**  
1188 Glycogen standard curves from the glycogen content quantification assay. The lines represent  
1189 linear regressions fitted to the data of each experiment. (n=4 independent experiments, 3  
1190 technical replicates). The line represents a fitted linear regression. **(F)** Linear dilution series of  
1191 planarian glycogen extract (blue line) and the predicted cumulative dilution series of extract with  
1192 spiked-in glycogen (concentration =0.16  $\mu\text{g}/\text{ul}$ ) (red line). The predicted sums for the extract  
1193 with spiked-in glycogen (red line) are closely in line with the measured sums of extract and  
1194 spiked-in glycogen (dotted grey line), demonstrating the linearity of the assay across the entire  
1195 concentration range. The lines represent fitted linear regressions.  
1196



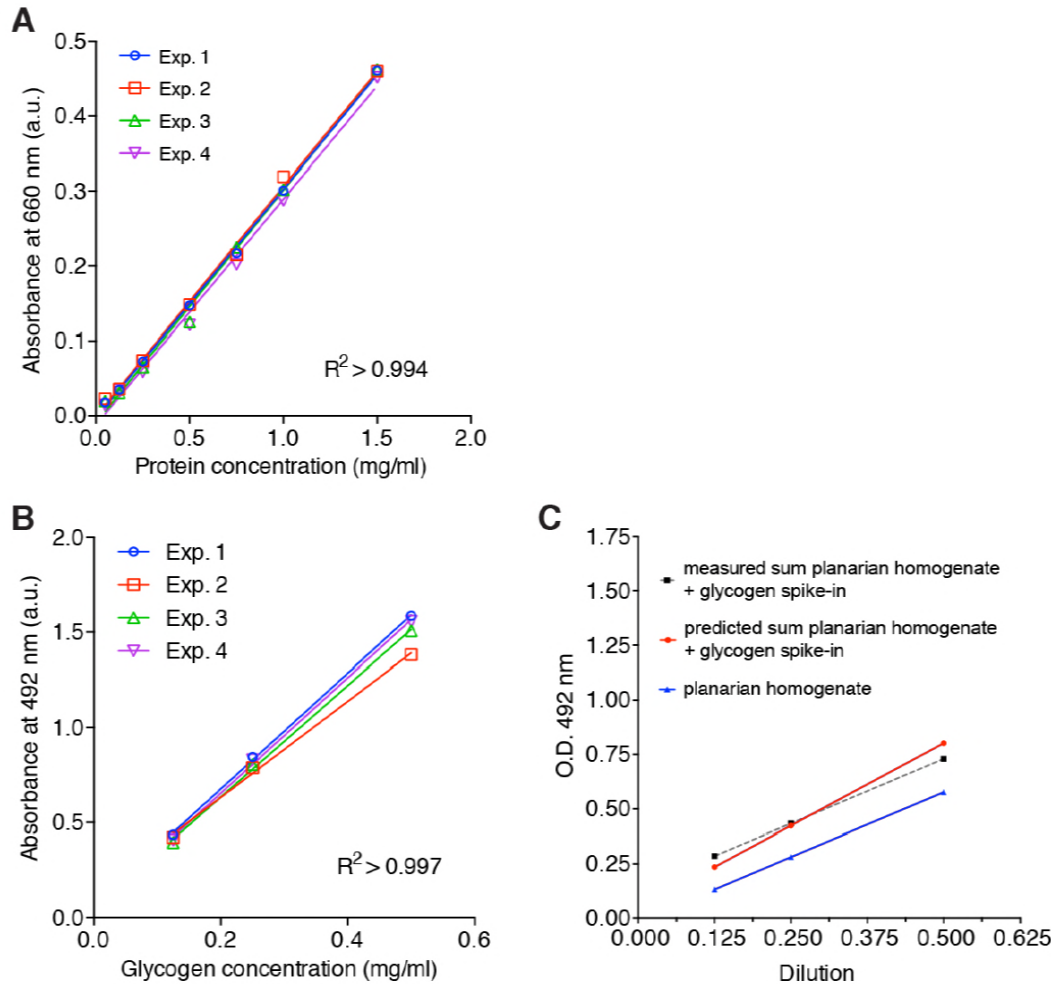

1197

1198 **Figure 5 – figure supplement 1. Standard curve protein and validation of total**

1199 **carbohydrate measurement.** (A) Standard curves of the colorimetric protein quantification. The

1200 lines represent linear regressions fitted to the data of each experiment (n=4 independent

1201 experiments, 3 technical replicates). (B) Glycogen standard curves from the phenol-sulfuric acid

1202 method. The lines represent linear regressions fitted to the data of each experiment (n=4

1203 independent experiments, 3 technical replicates). (C) Linear dilution series of planarian

1204 homogenate (blue line) and the predicted series of homogenate with spiked-in glycogen

1205 (conc.=0.25  $\mu\text{g}/\mu\text{l}$ ) (red line). The predicted sums for the homogenate with spiked-in glycogen

1206 (red line) are closely in line with the measured sums of homogenate and spiked-in glycogen

1207 (dotted grey line), demonstrating the linearity of the assay across the entire concentration range.

1208 The lines represent fitted linear regressions.

1209

1210

1211 **List of figure supplements**

1212

1213 Figure 1 – figure supplement 1.

1214 Measurement of body size and metabolic rate.

1215

1216 Figure 2 – figure supplement 1.

1217 Validation of image-based quantification of organismal cell number.

1218

1219 Figure 2 – figure supplement 2.

1220 Degrowth rates are independent of feeding history.

1221

1222 Figure 3 – figure supplement 1 (text only).

1223 Implementation of the theoretical model.

1224

1225 Figure 3 – figure supplement 2.

1226 Further explanation of model paradigm 1.

1227

1228 Figure 3 – figure supplement 3.

1229 Paradigm validation.

1230 Figure 4 – figure supplement 1.

1231 Alternative assays confirm lipid and glycogen storage in planarians.

1232

1233 Figure 5 – figure supplement 1.

1234 Standard curve protein and validation of total carbohydrate measurement

1235

1236

1237 **List of source data**

1238

1239 Figure – source data 1.

1240 Numerical data wet mass vs. dry mass measurements.

1241

1242 Figure 2 – source data 1.

1243 Numerical data cell number measurements.

1244

1245 Figure 2 – source data 2.

1246 Raw numerical data Histone H3 method (quantitative Western blotting)

1247

1248 Figure 2 – source data 3.

1249 CellProfiler results tables image-based approach.

1250

1251 Figure 2 – source data 4.

1252 MATLAB code for extraction of planarian body size.

1253 Figure 2 – source data 5.  
1254 Numerical data growth/degrowth.  
1255  
1256 Figure 3 – source data 1.  
1257 Numerical data for Figure 3.  
1258  
1259 Figure 4 – source data 1  
1260 Raw images lipid droplet and glycogen.  
1261  
1262 Figure 4 – source data 2  
1263 Raw data lipid mass spectrometry, glycogen assay and statistics tables.  
1264  
1265 Figure 5 – source data 1  
1266 Raw data and statistics tables for measurement of other lipids, carbohydrates and protein.  
1267  
1268 Figure 1 – figure supplement 1 – source data 1  
1269 Raw data metabolic rate measurements.  
1270  
1271 Figure 2 – figure supplement 1 – source data 1  
1272 CellProfiler pipeline, numerical data, raw images and segmentation for validation of image-  
1273 based cell counting.  
1274  
1275 Figure 3 – figure supplement 3 – source data 1

1276 Numerical data for Figure 2 – figure supplement 3.

1277 **List of supplementary files**

1278 List of scaling relationships.

1279
